# 1 Maternal iron deficiency perturbs embryonic cardiovascular development

2  
3 Jacinta I. Kalisch-Smith<sup>1</sup>  
4 Nikita Ved<sup>1</sup>  
5 Dorota Szumska<sup>1</sup>  
6 Jacob Munro<sup>2</sup>  
7 Michael Troup<sup>2</sup>  
8 Shelley E. Harris<sup>1</sup>  
9 Aimée Jacquemot<sup>1</sup>  
10 Jack J. Miller<sup>1,3,4</sup>  
11 Eleanor M. Stuart<sup>1</sup>  
12 Magda Wolna<sup>1</sup>  
13 Emily Hardman<sup>5</sup>  
14 Fabrice Prin<sup>5</sup>  
15 Eva Lana-Elola<sup>5</sup>  
16 Rifdat Aoidi<sup>5</sup>  
17 Elizabeth M. C. Fisher<sup>6</sup>  
18 Victor L. J. Tybulewicz<sup>5,7</sup>  
19 Timothy J. Mohun<sup>5</sup>  
20 Samira Lakhali-Littleton<sup>1</sup>  
21 Eleni Giannoulatou<sup>2,8</sup>  
22 \*Duncan B. Sparrow<sup>1</sup>

23  
24 1. Department of Physiology, Anatomy and Genetics, BHF Centre of Research Excellence,  
25 University of Oxford, Oxford, United Kingdom

26 2. Victor Chang Cardiac Research Institute, Molecular, Structural and Computational  
27 Biology Division, Sydney, NSW, Australia

28 3. Department of Physics, Clarendon Laboratory, University of Oxford, Oxford, United  
29 Kingdom

30 4. Oxford Centre for Clinical Magnetic Resonance Research, John Radcliffe Hospital,  
31 Oxford, UK

32 5. The Francis Crick Institute, London, United Kingdom

33 6. Institute of Neurology, University College London, London, United Kingdom

34 7. Imperial College London, London, United Kingdom

35 8. St Vincent's Clinical School, University of New South Wales, Sydney, NSW, Australia

36 \* corresponding author

## 37 Abstract

38 Congenital heart disease (CHD) is the most common type of birth defect, with a global  
39 prevalence of 0.9% of live births<sup>1</sup>. Most research in the last 30 years has focused on  
40 finding genetic causes of CHD. However, despite the association of over 100 genes with  
41 CHD, mutations in these genes only explain ~30% of cases<sup>2</sup>. Many of the remaining cases  
42 of CHD are caused by *in utero* exposure to environmental factors<sup>3</sup>. Here we have  
43 identified a completely new environmental teratogen causing CHD: maternal iron  
44 deficiency. In humans, iron deficiency anaemia is a major global health problem. 38% of  
45 pregnant women worldwide are anaemic<sup>4</sup>, and at least half of these are due to iron  
46 deficiency, the most prevalent micronutrient deficiency. We describe a mouse model of  
47 maternal iron deficiency anaemia that causes severe cardiovascular defects in her  
48 offspring. We show that these defects likely arise from increased retinoic acid signalling in  
49 iron deficient embryos, probably due to reduced activity of the iron-dependent retinoic acid  
50 catabolic CYP26 enzymes. The defects can be prevented by maternal iron administration  
51 early in pregnancy, and are also greatly reduced in offspring of mothers deficient in both

52 iron and the retinoic acid precursor vitamin A. Finally, one puzzling feature of many genetic  
53 forms of CHD in humans is the considerable variation in penetrance and severity of  
54 defects. We show that maternal iron deficiency acts as a significant modifier of heart and  
55 craniofacial phenotype in a mouse model of Down syndrome. Given the high incidence of  
56 maternal iron deficiency, peri-conceptual iron monitoring and supplementation could be a  
57 viable strategy to reduce the prevalence and severity of CHD in human populations  
58 worldwide.

### 59 **Maternal iron deficiency perturbs embryonic development**

60 Cardiac outflow tract (OFT) defects are the most common subtype of CHD<sup>1</sup>. In addition to  
61 arising from genetic mutation, such defects can be induced in mouse embryos by  
62 environmental factors including maternal exposure to hypoxia<sup>5</sup> or by pharmacological  
63 activation of HIF1 signalling<sup>6</sup>. However, since such hypoxia studies do not replicate any  
64 particular clinical condition, it is uncertain how relevant these findings are to human  
65 populations. One way in which embryonic hypoxia might occur clinically is through  
66 maternal or embryonic anaemia. This is a major global health problem, affecting 20-40% of  
67 women of child-bearing age, a total of more than 500 million individuals<sup>4</sup>. Maternal  
68 anaemia in rabbits<sup>7</sup> and maternal iron deficiency (ID) in rats<sup>8</sup> can result in embryonic  
69 lethality, but the molecular mechanisms are unknown. In humans, at least half of all cases  
70 of anaemia result from ID<sup>4</sup>. Furthermore, low iron intake during pregnancy in humans may  
71 increase the risk of intrauterine growth restriction<sup>9</sup> and CHD<sup>10</sup>. To investigate further, we  
72 used our previously published model of maternal ID<sup>11</sup>. Female C7BL/6J strain mice were  
73 weaned onto, and maintained continuously on, a low iron diet (2-6 ppm). At maturity, these  
74 mice had significantly reduced blood haemoglobin (Extended Figure 1a) and liver iron  
75 levels (Extended Figure 1b-e) compared to females fed a standard diet (200 ppm iron). ID  
76 females were mated to iron-replete C57BL/6J males, then maintained on the low iron diet  
77 until embryo collection on E15.5. ID embryo morphology was compared to that of embryos  
78 from control mothers (Figure 1a,b). Microscopic Magnetic Resonance Imaging ( $\mu$ MRI)  
79 showed that E15.5 embryos had significantly reduced liver iron levels (Extended Figure 1f-  
80 h). Macroscopic observation at dissection revealed that 12/80 ID embryos had died  
81 recently (0/58 controls,  $P=0.0010$ ) and 26/68 of the surviving ID embryos had significant  
82 subcutaneous oedema (0/58 controls,  $P<0.0001$ ). To determine the developmental  
83 progression of these phenotypes, we examined ID embryos between E9.5 and E14.5  
84 (Figure 1c). Oedema and recent death were observed in a significant number of embryos  
85 from E12.5 onwards, with a peak at E13.5 ( $P=0.0008$  vs E12.5 and  $P=0.0067$  vs E15.5).  
86 Despite this, there was no significant difference in litter size (including dead embryos)  
87 between E10.5 and E15.5 (Extended Figure 1i), suggesting that additional undetected  
88 death and resorption of embryos was not occurring. We conclude that maternal ID  
89 severely perturbs embryonic development in mouse.

### 90 **ID embryos have cardiovascular defects**

91 We hypothesised that maternal anaemia causes embryonic hypoxia, which we have  
92 previously shown leads to a variety of embryonic defects, most notably in the  
93 cardiovascular system<sup>5</sup>. To test this hypothesis, we examined cardiac morphology in  
94 surviving ID embryos at E15.5 (Figure 1d-g, Extended Table 1). 30/42 of these embryos  
95 had heart defects (1/37 controls,  $P<0.0001$ ). Membranous and muscular ventricular septal  
96 defects (VSDs) were most common (Figure 1e,f), occasionally coupled with double-outlet  
97 right ventricle (DORV) or overriding aorta (OA). Finally, 5/42 embryos had atrioventricular  
98 septal defects (AVSD, Figure 1g, yellow arrow) compared to 0/37 controls ( $P=0.040$ ). In  
99 addition, the ventricular myocardium was significantly thinner in all ID embryos (Figure 1e-  
100 g, black arrowheads; quantified in Extended Figure 2a), and in some embryos the  
101 ventricular septum (VS) was non-compacted (Figure 1f,g, yellow arrowheads). To  
102 investigate the developmental origins of the heart defects, we measured OFT physical

103 parameters at E10.5 using 3D volume-rendered high resolution episcopic microscopy  
104 (HREM) datasets (Extended Figure 2b,c). Because OFT morphology changes rapidly, we  
105 matched embryos by Thielier stage (TS). In control embryos, distal OFT length increased  
106 from TS16 (30-34 somites) to TS 18 (40-44 somites), whilst the angle between distal and  
107 proximal OFT decreased. By contrast, at TS16 ID embryos had a significantly shorter  
108 distal OFT, and by TS18, they had a significantly larger distal/proximal OFT angle than  
109 controls. These observations are similar to mouse models of CHD caused by a reduced  
110 contribution of second heart field (SHF) cardiac progenitor cells to the OFT, including  
111 *Tbx1*, *Hes1* and *Hoxb1* null embryos, and embryos exposed to hypoxia *in utero*<sup>5,12-14</sup>. In  
112 these studies, reduced OFT length is proposed to cause malrotation and malalignment of  
113 the OFT at later developmental stages. In keeping with this hypothesis, by E12.5 5/8 ID  
114 embryos had a non-rotated OFT based on cardiac cushion position (Figure 1k), 2/8 were  
115 partially-rotated (Figure 1j) whilst only 1/8 was normal (Figure 1i), compared to 9/9 control  
116 embryos with normal OFT rotation (Figure 1h)  $P=0.0004$ ). The non-rotated OFTs in ID  
117 embryos resembled those of control E11.5 embryos (Figure 1l).

118 We also found both OFT and atrio-ventricular (AV) cardiac cushions were abnormal at this  
119 stage. The cardiac cushions are the precursors of the valves and septa<sup>15</sup>. The OFT  
120 cushions form the aortic valve (AoV), pulmonary valve (PV) and the spiral septum dividing  
121 the OFT into the aorta and the pulmonary artery<sup>16</sup>. They are also required for the final  
122 closure of the tertiary ventricular foramen in the ventricular septum required to functionally  
123 separate the left and right ventricles<sup>17</sup>. The AV cushions contribute to the AV valves, as  
124 well the atrial and ventricular septa. In the OFT, the two major cushions are elongated and  
125 spiral around the OFT. In between the major cushions are two smaller ridges, called  
126 intercalating cushions (ICC) or intercalated valve swellings. By E12.5, the major cushions  
127 fuse to form the aortico-pulmonary septum as well as the right and left coronary cusps of  
128 the AoV and the right and left cusps of the PV. The ICC do not fuse: the aortic ICC forms  
129 the non-coronary (NC) leaflet of the AoV, and the pulmonary ICC forms the non-facing  
130 (NF) leaflet of the PV. At E12.5, proximal OFT cushion fusion had not occurred in 8/8 ID  
131 embryos (Figure 1i-k white arrows), compared to 2/9 controls ( $P=0.0019$ ). Possibly this  
132 phenotype was due to generalised developmental delay, since ventricular volumes were  
133 significantly smaller in ID embryos (Extended Figure 2d). However, the appearance of  
134 external morphological landmarks was comparable between ID and control embryos, and  
135 by E13.5, the proximal OFT cushions were still not fused in 5/5 ID embryos (0/5 controls,  
136  $P=0.0040$ ). Concomitant with the morphological differences in the OFT at E12.5, the right  
137 OFT cushion and both ICCs were significantly smaller in ID embryos (Extended Figure 2f-  
138 h), although the left OFT cushion was not significantly changed (Extended Figure 2e). The  
139 aortic ICC was the most affected, being only 25% of normal volume, whilst the pulmonary  
140 ICC and right OFT cushion were ~70% normal size.

141 AV cushion formation was also abnormal in ID embryos. There are four AV cushions. The  
142 large inferior and superior cushions contribute to the atrial and ventricular septa, the aortic  
143 leaflet of the mitral valve (MV) and the septal leaflet of the tricuspid valve (TV). The smaller  
144 right lateral cushion forms the anterior and posterior leaflets of the TV, and the left lateral  
145 cushion forms the mural leaflet of the MV. At E12.5, the superior AV cushion volume was  
146 the same between control and ID embryos, but the inferior AV cushion was slightly smaller  
147 (Extended Figure 2i,j). In addition, the left and right lateral AV cushions were completely  
148 absent from 3/8 ID embryos (Figure 1p; 0/9 controls,  $P=0.0824$ ), although there was no  
149 significant difference in volume between extant lateral cushions in ID embryos and controls  
150 (Extended Figure 2k,l). These cushions were also absent in 3/3 E11.5 control embryos  
151 (Figure 1q), suggesting that this might be due to delayed development. In addition, the  
152 inferior and superior cushions were not apposed in 4/8 ID embryos at E12.5, when fusion  
153 is normally complete (Figure 1o,p; yellow arrows; 0/9 controls,  $P=0.0294$ ). These cushions

154 were still not touching in 3/5 E13.5 ID embryos, suggesting a persistent defect rather than  
155 a developmental delay. The presence or absence of AV cushion contact did not correlate  
156 well with the extent of OFT rotation, as 3/5 embryos with the most severe OFT rotation  
157 defect (Figure 1k) had normal AV cushion contact, and 2/2 embryos with milder OFT  
158 rotation defects (Figure 1j) had non-touching AV cushions. In normal development, as the  
159 aortic root shifts from over the right ventricle to its final position over the left ventricle, the  
160 fused proximal OFT cushions align with the growing tip of the muscular VS<sup>16,18</sup>. The  
161 remaining interventricular communication is then closed at E14.5 by the membranous VS  
162 that forms by fusion of the rightward tips of the AV cushions with the proximal OFT  
163 cushions. Delayed or failed proximal cushion fusion, or incomplete shifting of the aortic  
164 root, will result in VSD, OA and DORV; and failed OFT-AV cushion fusion will prevent  
165 membranous VS formation and can contribute to AVSD. Thus, the cardiac defects  
166 observed at E15.5 in ID embryos are likely to arise from the OFT and AV cushion defects  
167 observed at E12.5.

168 Clinically, cardiac OFT defects commonly occur in conjunction with aortic arch (AA)  
169 anomalies. Typically, such defects originate from a failure of pharyngeal arch artery (PAA)  
170 formation or remodelling from E9.5. During normal development, the first three pairs of  
171 PAA form prior to TS16<sup>19</sup>. By TS16, the fourth pair appears, whilst the first two pairs  
172 regress, and no longer connect to the dorsal aorta (Figure 2a). The sixth pair develops by  
173 TS18, thus at this stage there are symmetrical arteries in the third, fourth, and sixth  
174 pharyngeal arches (Figure 2c). At TS16, whilst all ID embryos had fully patent PAA3, 5/12  
175 ID embryos had bilaterally absent PAA4 (Figure 2b) and in the remainder, PAA4 was only  
176 partially formed on both sides, compared to 7/7 controls with fully patent PAA3-4,  
177 ( $P < 0.0001$ ). In addition, in 8/12 embryos the second PAA was still connected to the dorsal  
178 aorta (7 bilaterally and 1 unilaterally; Figure 2b', black arrow), compared to 1/7 controls  
179 (Figure 2a,b;  $p = 0.0399$ ). By TS18, whilst all ID embryos had patent PAA3, 2/7 had absent  
180 or interrupted PAA4 (1 bilateral and 1 unilateral) and 3/7 had absent or interrupted PAA6  
181 (2 bilateral and 1 unilateral; Figure 2d, white arrows; 6/6 controls with fully patent PAA3-6;  
182  $P = 0.1224$ ). In addition, 4/7 ID embryos had bilaterally hyperplastic PAA2, with one of  
183 these still patent with the dorsal aorta (0/6 controls,  $P = 0.049$ ). This suggests that PAA  
184 development was delayed and abnormal. Indeed, at E12.5, 8/8 ID embryos had persistent  
185 right dorsal aorta (Figure 2f, orange arrow, 0/9 controls,  $P < 0.0001$ ). Unexpectedly, by  
186 E15.5 only 5/40 ID embryos had AA anomalies (Extended Table 2, 1/37 controls,  
187  $P = 0.1189$ ). These included interrupted AA (IAA), aberrant right subclavian artery (A-RSA,  
188 Figure 2h, yellow arrow), right-sided AA and retroesophageal left subclavian artery (R-  
189 LCC, associated with right-sided AA). A similar decrease in the penetrance of AA  
190 anomalies between E10.5 and foetal stages has been observed in mouse knockout  
191 models<sup>20,21</sup>. Litter size did not differ significantly between E10.5 and E15.5 (Extended  
192 Figure 1i,  $P = 0.7283$ ), thus this did not result from increased lethality of embryos with  
193 abnormal AA formation prior to E15.5. This suggests that may be compensatory  
194 mechanisms allowing phenotypic recovery. The phenotypes observed at E15.5 are typical  
195 of a failure of PAA4 formation<sup>22</sup>. Therefore, the aortic arch defects in ID embryos are likely  
196 to arise from the observed perturbation of PAA4 formation earlier in development.

### 197 **Maternal ID causes premature differentiation of SHF cardiac progenitor cells**

198 We next investigated the developmental origin of the cardiovascular defects. Four different  
199 cell lineages contribute to OFT cardiac cushion formation: endocardium, second heart field  
200 (SHF), cardiac neural crest (CNC) and epicardium<sup>15</sup>. Each particular cushion contains a  
201 characteristic combination of cells derived from a subset of these lineages. The aortic ICC  
202 was most severely effected in ID embryos (Extended Figure 2g). This cushion is  
203 predominantly composed of SHF-derived cells<sup>23-25</sup>, suggesting that the reduction in  
204 cushion size might be due to a lack of this cell type. A variety of mouse knockout models

205 with cardiac OFT defects have a deficit of anterior SHF cells. This can arise by a variety of  
206 processes including premature differentiation<sup>26</sup>, disruption of proliferation<sup>5,27,28</sup> or inhibited  
207 migration<sup>29</sup>. To investigate if any of these mechanisms were also occurring in ID embryos,  
208 we compared the transcriptomes of aSHF cells from ID and control embryos. We also  
209 compared these data with the transcriptome of aSHF cells from embryos exposed to  
210 hypoxia *in utero*, the molecular effects of which we have previously described<sup>5</sup>. ID and  
211 control female C57BL/6J mice were mated with hemizygous *Mef2c-AHF-GFP* males<sup>30</sup>.  
212 This allele directly drives GFP expression from the *Mef2c-AHF* enhancer element,  
213 specifically marking cells strongly in the aSHF and weakly in the distal OFT (Extended  
214 Figure 3a). For control and ID samples, embryos were collected at E9.5. For hypoxia  
215 samples, pregnant mice were exposed to an atmosphere containing 6% oxygen for four  
216 hours on E9.5, and embryos collected immediately after exposure. RNA was isolated from  
217 GFP+ cells from five individual somite-matched embryos for each condition and RNA  
218 sequencing (RNA-Seq) was performed. Unsupervised hierarchical clustering correctly  
219 grouped samples (Extended Figure 3b). As expected from our previous study<sup>5</sup>, differential  
220 expression (DE) analysis showed that aSHF cells from hypoxic embryos had increased  
221 expression of unfolded protein response (UPR) genes and spliced *Xbp1* transcript;  
222 elevated transcript levels of hypoxia-response genes (including those involved in  
223 metabolism, angiogenesis and pathway regulation); increased expression of cell cycle  
224 inhibitors; decreased expression of cell-cycle progression genes; but no induction of  
225 apoptotic HIF1 targets (Extended Figure 3d). By contrast, aSHF cells from ID embryos did  
226 not activate UPR response genes or HIF1 targets, nor was cell-cycle gene expression  
227 altered. Overall, there was very little overlap in the significantly DE genes between ID and  
228 hypoxia samples (Extended Figure 3c). We used gene ontology (GO) analysis with the  
229 GSEA online resource<sup>31,32</sup> to provide an unbiased assessment of significantly altered  
230 pathways. As expected, the top upregulated gene set in the hypoxia samples was  
231 Hallmark\_hypoxia ( $P=5.33 \times 10^{-55}$ ), and the top downregulated gene set was  
232 Hallmark\_mitotic\_spindle ( $P=7.66 \times 10^{-10}$ ). By contrast, the most enriched gene set in the ID  
233 model was Hallmark\_myogenesis ( $P=4.65 \times 10^{-17}$ ). Further analysis of the ID dataset  
234 revealed that expression of multiple markers of cardiac OFT differentiation were  
235 significantly upregulated (Extended Figure 3d). We also compared the top significantly DE  
236 transcripts from ID embryos with data from single cell transcriptomic analysis of the  
237 cardiogenic regions of E9.25 embryos<sup>33</sup>. The ID transcriptome was most closely related to  
238 the OFT cluster, rather than to the aSHF cluster ( $P=3 \times 10^{-6}$ , Extended Figure 3e).

239 Premature differentiation of the aSHF is a feature of several mouse knockout models with  
240 similar cardiac defects to our ID model, including *Tbx1* null<sup>26,34</sup> and *Hoxb1* null<sup>14</sup> embryos.  
241 In these models, premature differentiation of aSHF cells at E9.5 causes similar  
242 phenotypes to ID, namely defective OFT elongation, alignment and septation, resulting in  
243 a specific set of cardiac defects by E15.5 including membranous VSDs (with or without  
244 DORV or OA), transposition of the great arteries (TGA) and persistent *truncus arteriosus*  
245 (PTA), as well as AA anomalies. We validated the presence of premature differentiation in  
246 the SHF by examining protein expression levels and pattern of the myocyte differentiation  
247 marker MHC (Figure 3a-e). MHC expression is normally restricted to the wall of the OFT,  
248 with no expression in the contiguous cells of the aSHF (Figure 3a). By contrast, in ID  
249 embryos ectopic MHC expression extended into the aSHF (Figure 3b), and a significantly  
250 larger number of aSHF cells expressed MHC. Similar defects can be caused by reduced  
251 cell proliferation<sup>35,36</sup> or activation of cell death<sup>35</sup> in the SHF. However, there was no  
252 significant difference in the percentage of phosphorylated histone H3-positive nuclei  
253 between ID and control SHF cells (Extended Figure 4a-d), and no apoptosis was detected  
254 in the SHF by active/pro-CASPASE 3 staining (data not shown). The cardiac transcription  
255 factor GATA4 is a key regulator that promotes the switch from proliferation to  
256 differentiation in SHF cells<sup>26</sup>. *Gata4* transcripts were significantly increased in the ID aSHF

257 transcriptome (Extended Figure 3d), and GATA4 protein levels were ectopically expressed  
258 in the aSHF of ID embryos at E9.5 (Figure 3f-i). By contrast, the expression levels and  
259 domain of TBX5 protein, a marker of the posterior SHF, were unchanged (Extended Figure  
260 4e-g). GATA4 directly activates the transcription of many cardiac differentiation genes and  
261 transcription factors, including MHC<sup>37</sup>. Many of these direct GATA4 targets were also  
262 significantly upregulated in the ID aSHF transcriptome (Extended Figure 3d). In *Tbx1* null  
263 embryos, *Gata4* expression is elevated, and SHF cells prematurely differentiate<sup>26</sup>. Thus, it  
264 is likely that the cardiovascular defects in the ID embryos result from premature  
265 differentiation of aSHF cells, which then fail to migrate into the OFT, OFT cushions and  
266 aortic arches.

### 267 **Embryos show perturbed retinoic acid signalling**

268 The cardiovascular defects observed in ID embryos resemble those present in mouse or  
269 chick embryos with excess retinoic acid (RA) signalling<sup>38-40</sup>, after exposure to excess  
270 vitamin A<sup>41</sup>, or in humans exposed to the drug isotretinoin<sup>42</sup>. In mouse embryos, RA  
271 signalling is mediated by all-*trans* retinoic acid (ATRA). This compound is synthesised  
272 from vitamin A, and can be subsequently catabolised to the biologically inactive compound  
273 4-hydroxy ATRA by the CYP26 family of cytochrome P450 enzymes. The active site of  
274 CYP26 enzymes incorporates haem, so we hypothesised that RA catabolism might be  
275 reduced in ID embryos, resulting in excess RA signalling. Supporting this hypothesis,  
276 *Cyp26b1* null mouse embryos have a similar spectrum of heart defects to ID embryos (C.  
277 Roberts, personal communication). In addition, *Gata4* transcription is directly activated by  
278 RA signalling<sup>43,44</sup>, thus this might also explain the ectopic upregulation of *Gata4* in ID  
279 embryos. To test this hypothesis, we examined the level of RA signalling in ID embryos  
280 using the RARE-LacZ transgenic reporter<sup>45</sup>. Males carrying the RARE-LacZ allele were  
281 crossed with control or ID C57BL/6J females, embryos collected at E9.5, and stained for  
282  $\beta$ -galactosidase activity with X-gal. In control embryos at E9.5,  $\beta$ -galactosidase activity  
283 was present in paraxial mesoderm, SHF, OFT and brain, as previously described<sup>45</sup>. ID  
284 embryos had a broadly similar expression pattern, however X-gal staining developed more  
285 rapidly, suggesting higher levels of RA signalling in ID embryos. Sections from embryos  
286 dissected on the same day and stained for the same time confirmed that ID embryos had  
287 stronger SHF and OFT expression than controls (Figure 3j,k). In addition, expression was  
288 patchy in ID embryos (Figure 3k, arrows) and was also present in the ventricle (Figure 3k,  
289 arrowhead). Two-channel HREM of X-gal-stained E9.5 embryos coupled with 3D  
290 reconstruction in Amira was used better visualise the 3D pattern of RA expression in the  
291 OFT (Figure 3l,m). This shows that RA signalling levels were present in a larger domain of  
292 the OFT. These data suggest that ID embryos have increased RA signalling in the SHF  
293 and OFT, causing ectopic activation of *Gata4* in the SHF and initiating premature  
294 differentiation of these cells.

### 295 **Other embryonic processes dependent on RA signalling are perturbed in ID embryos**

296 In addition to cardiovascular development, RA signalling has many other roles throughout  
297 embryonic development<sup>46</sup>. To determine if ID causes a more general upregulation of RA  
298 signalling in the developing embryo, we investigated if the development of any other RA-  
299 dependent systems were also perturbed. We first investigated the origins of the  
300 subcutaneous oedema observed at E15.5. This is a relatively common phenotype in  
301 embryonic lethal and sub-viable knockout mouse models. For example, in an unbiased  
302 survey of embryonic lethal mouse strains, 24/42 had subcutaneous oedema at E14.5<sup>47</sup>. In  
303 humans, this phenotype is called *hydrops fetalis* and can arise from embryonic anaemia or  
304 cardiovascular defects, resulting in cardiac failure and a generalised fluid build-up<sup>48</sup>. In our  
305 study, we assessed 42 ID E15.5 embryos for both oedema and heart defects. 26 were  
306 concordant and 16 discordant, thus there was no correlation between the presence of  
307

308 oedema and heart defects ( $P < 0.0001$ ). Alternatively, oedema can be caused by a failure of  
309 normal lymphatic development. This process requires RA signalling, and genetic knockout  
310 of *Cyp26b1* results in an identical phenotype to that observed in ID embryos<sup>39</sup>. Therefore,  
311 we investigated whether lymphatic development was compromised in ID embryos. The  
312 blood and lymphatic vasculature were visualised in E14.5 dorsal back skin using CD31,  
313 PROX1 and NRP2 antibodies<sup>49</sup> (Figure 4a,b). Lymphatic vessels in ID embryos had  
314 significantly increased in vessel diameter (Figure 4c) and the vessels had more PROX1-  
315 positive nuclei (compare Figure 4 panels a'' and b''). The degree of increase in lymphatic  
316 vessel diameter (33 → 52 μm) was similar to other mouse models with perturbed lymphatic  
317 development<sup>39,50</sup>. By contrast, inter-vessel distance was not significantly altered (Figure  
318 4d), nor were there changes in the patterning of the blood vasculature (Figure 4 a''',b''').  
319 These data suggest that the changes in lymphatic vasculature may be due to a primary  
320 defect in lymphatic development, rather than to increased dilation of the vessels  
321 subsequent to cardiac failure. In control E11.5 embryos, RA signalling is activated  
322 between the dorsal aorta and the ventro-medial side of the cardinal vein (Bowles et al<sup>39</sup>;  
323 Figure 4e,f). This is on the opposite wall of the cardinal vein from where lymphatic  
324 endothelial cell (LEC) progenitors arise. In ID embryos, RA signalling was increased and  
325 expanded dorsally (Figure 4g,h). This is indistinguishable from the phenotypes observed in  
326 *Cyp26b1* null embryos, where RA signalling is also increased<sup>39</sup>.

327 We next examined the development of the coronary vasculature. This develops  
328 through a stepwise vasculogenic program. Firstly, an immature vessel plexus forms, and  
329 then this is remodelled into a mature vascular bed<sup>51</sup>. The coronary endothelial progenitors  
330 arise mostly from the *sinus venosus* (SV) and the endocardium<sup>52</sup>. The epicardium, a layer  
331 of cells that migrates over the heart surface from E9.0, is also required for coronary  
332 vascular development<sup>53</sup>. It secretes trophic factors, including RA, that stimulate myocardial  
333 growth and coronary plexus development. It also contains epicardial-derived progenitor  
334 cells (EPDCs) that give rise to cardiac fibroblasts and vascular smooth muscle cells  
335 (VSMC) that stabilise the coronary vasculature. EPDCs also contribute to the lateral AV  
336 cushions<sup>54</sup>, which were missing in some ID embryos (Figure 1p). 8/8 control hearts at  
337 E14.5 had normal coronary plexus formation on both dorsal and ventral surfaces (Figure  
338 4i,k). By contrast, 8/8 ID hearts showed a reduced plexus area, and large numbers of  
339 endothelial nodules were present on both heart surfaces (Figure 4j,l, black arrows). This is  
340 similar to models of perturbed coronary vascular development due to increased RA  
341 signalling<sup>55,56</sup>. By E17.5, 6/6 control E17.5 hearts had clear CD31-positive endothelial  
342 tubes throughout the myocardium (Figure 4m,n). By contrast, 6/6 E17.5 ID embryos had  
343 fewer obvious endothelial tubes in the myocardium. Instead, patches of CD31-positive  
344 cells were visible on the surface of the heart (Figure 4p, white arrows). This phenotype is  
345 very similar to that of *Dhrs3* null embryos with increased RA signalling<sup>56</sup>. However, despite  
346 the abnormal patterning of distal coronary vessels, the patterning of the proximal coronary  
347 vessels was normal. 15/16 E15.5 ID embryos had correctly positioned coronary ostia,  
348 although 6/16 had a single additional coronary ostia unilaterally (1 right and 5 left), in line  
349 with the previously noted incidence in the C57BL/6J strain<sup>57</sup>. In the absence of normal  
350 epicardial formation, myocardial growth is often reduced. Fittingly, ventricular compact  
351 myocardium thickness was significantly reduced in E15.5 ID embryos (Extended Figure  
352 2a). Typically, embryos with faulty epicardium and/or coronary vascular development die *in*  
353 *utero* between E12.5-15.5, thus these observations may explain the embryonic lethality in  
354 ID embryos.

355 Finally, somite segmentation is also regulated by RA signalling. Excess RA causes  
356 abnormalities in vertebral patterning and delayed ossification<sup>38</sup>. We therefore examined  
357 the developing skeletal cartilage in E14.5 embryos by alcian blue staining. 29/33 ID  
358 embryos had mild vertebral segmentation defects, including fused lamina, missing

359 pedicles and split vertebral bodies (Extended Figure 4i, 0/21 controls,  $p < 0.0001$ ).

360 In summary, ID embryos have defects in a variety of tissues that require RA  
361 signalling for normal patterning, and these defects are similar to those in genetic models of  
362 increased RA signalling. Thus, our data supports the hypothesis that ID results in a wide-  
363 spread disruption of RA signalling in the developing embryo.

### 364 **Dietary supplementation mid-gestation rescues the heart and lymphatic phenotypes**

365 Clinically, ID can be treated rapidly and effectively by intravenous administration of ferric  
366 carboxymaltose or dietary supplementation. Therefore, it would be useful to know if, and  
367 when, during pregnancy that iron supplementation might rescue embryonic defects. We  
368 transferred pregnant ID mice from low iron to normal diet (200 ppm iron) 7-9 days post-  
369 mating. In each case, maternal haemoglobin levels returned to normal by E15.5 (Extended  
370 Figure 5a). Diet change on days 8 or 9 had no significant effect on the prevalence of either  
371 oedema or embryonic lethality at E15.5 (Figure 5a). By contrast, diet change on day 7  
372 resulted in a significant reduction in both oedema and embryonic lethality (2/53 embryos  
373 abnormal or dead, compared to 38/80 ID embryos,  $P < 0.0001$ ; and 0/58 controls,  
374  $P = 0.2257$ ). Furthermore, 0/26 of viable E7.5-rescued embryos examined at E15.5 had  
375 heart defects (30/42 ID embryos,  $P < 0.0001$ ; and 1/37 controls,  $P = 0.5873$ ; Extended Table  
376 1), indicating a complete rescue of the heart phenotype in these embryos. Iron uptake  
377 from the gut is swift, taking only a few hours<sup>58</sup>, and is even faster in ID animals with low  
378 hepcidin levels<sup>59</sup>. Once in the maternal bloodstream, iron is transferred to the embryo in  $< 6$   
379 hours<sup>60</sup>. Thus, phenotypic rescue by returning mothers to the iron-replete diet on E7.5, but  
380 not later, suggests that the critical period of embryonic development that is sensitive to ID  
381 is approximately E8.5. This is identical to studies of RA exposure, where embryonic heart  
382 development is most vulnerable at E8.5<sup>61-63</sup>. It is also broadly similar to our previous  
383 studies of embryonic hypoxia, which showed a peak in vulnerability of SHF cells to hypoxia  
384 at E9.5<sup>5</sup>. This stage of development is when SHF cells migrate into the OFT and when  
385 pharyngeal arch morphogenesis takes place. It also corresponds to the initial movement of  
386 epicardial cells to the heart's surface<sup>64</sup> and the induction of lymphatic endothelial cells in  
387 the wall of the cardinal veins<sup>65</sup>. Thus, restoration of normal RA signalling at this stage is  
388 likely to explain the rescued cardiac, lymphatic and coronary vessel defects.

### 389 **Mothers deficient for both iron and vitamin A produce normal embryos**

390 We next tested our mechanistic hypothesis by further altering the maternal diet. RA is  
391 produced from dietary vitamin A. It has been known since the 1930s that maternal vitamin  
392 A deficiency (VAD) disrupts development<sup>66</sup>, and this is now known to be caused by  
393 reduced embryonic RA signalling. We reasoned that embryos of a mother fed a diet low in  
394 iron (leading to increased RA signalling) and deficient in vitamin A (leading to reduced RA  
395 signalling) might result in relatively normal levels of RA, and thus restore normal  
396 embryonic development. Female C7BL/6J strain mice were weaned onto, and maintained  
397 continuously on, a diet containing low iron (2-6 ppm) and no added vitamin A (control and  
398 ID diets both have 15 IU/g vitamin A). As before, these mice had significantly reduced  
399 blood haemoglobin, confirming that VAD did not affect iron metabolism (Extended Figure  
400 5a). These mice were mated to control C57BL/6J males, then maintained on the ID/VAD  
401 diet until embryo collection on E15.5.  $\mu$ MRI imaging confirmed that embryos had reduced  
402 liver iron levels (Extended Figure 5c). Strikingly, only 1/27 embryos were dead and 3/27  
403 had oedema (Figure 5a). This is a significantly lower rate of death and abnormality than ID  
404 embryos (38/80 ID embryos,  $P = 0.0019$ ), although not a complete phenotypic rescue (0/58  
405 controls,  $P = 0.0087$ ). Furthermore, only 3/25 of these embryos had heart defects,  
406 compared to 30/42 ID ( $P < 0.0001$ ) and 1/37 control embryos ( $P = 0.1752$ ), indicating an  
407 almost complete rescue of heart defects. These data provide further evidence that the  
408 defects observed in embryos from ID embryos are due to increased RA signalling.

### 409 **Gene-environment interactions increase the penetrance and expressivity of**



## 410 **embryonic defects**

411 In human CHD, even in families with a known monogenic cause, there is often an array of  
412 different cardiac defects between individuals with the same causative mutation (variable  
413 expressivity), while others with the same mutation do not develop CHD at all (variable  
414 penetrance)<sup>67</sup>. This suggests that CHD phenotypes are commonly affected by genetic or  
415 environmental modifiers. Previously we have shown in mouse that short-term gestational  
416 hypoxia is one such modifier, increasing the prevalence and severity of heart defects in  
417 genetically-susceptible embryos, as well as causing heart failure and embryonic  
418 lethality<sup>68,69</sup>. We hypothesised that ID might cause a similar gene-environment interaction  
419 (GxE). Two of the most common human genetic syndromes that include CHD are 22q11.2  
420 deletion syndrome<sup>70</sup> and Down syndrome (DS)<sup>71</sup>. In both cases, the types of heart defects  
421 presented clinically are similar to those of the ID model. Furthermore, in *Tbx1* null embryos  
422 all three *Cyp26* genes are downregulated, suggesting that RA signalling may be altered in  
423 22q11.2 deletion syndrome<sup>40</sup>. It has long been appreciated that there is considerable  
424 variation in the severity and penetrance of cardiovascular phenotypes in human patients  
425 with either syndrome. To test the hypothesis that this variation might be controlled by an  
426 environmental factor such as ID, we crossed male C57BL/6J background mice  
427 heterozygous for either a *Tbx1* null allele<sup>72</sup> (a model of 22q11.2 deletion syndrome), or the  
428 *Dp1Tyb* duplication<sup>73</sup> (a model of DS), with ID females and analysed embryonic  
429 phenotypes at E15.5. In both cases, we confirmed that maternal haemoglobin levels were  
430 significantly reduced (Extended Figure 5a). There was no significant increase in the  
431 prevalence of embryonic death and oedema, heart defects or aortic arch abnormalities in  
432 *Tbx1*<sup>+/*null*</sup> ID embryos (Figure 5b; Extended Table 1; Extended Table 2). Thus, maternal  
433 low iron status is not likely to be a risk factor for increasing penetrance or severity of  
434 cardiovascular phenotypes in 22q11.2 deletion syndrome. Similarly, E15.5 ID embryos  
435 carrying the *Dp1Tyb* duplication (*Dp1Tyb*<sup>+</sup> ID) had the same prevalence of death and  
436 abnormality as *Dp1Tyb*<sup>-</sup> ID control littermates (Figure 5b, 19/27 *Dp1Tyb*<sup>+</sup> ID, 15/26  
437 *Dp1Tyb*<sup>-</sup> ID littermates, P=0.2498). Strikingly however, affected embryos had more severe  
438 subcutaneous oedema, and their lymphatics were more frequently blood-filled (Figure 5d;  
439 10/11 *Dp1Tyb*<sup>+</sup> ID oedemic embryos with blood-filled lymphatics compared to 4/11  
440 *Dp1Tyb*<sup>-</sup> ID, P=0.0119). In addition, we observed craniofacial defects in surviving  
441 *Dp1Tyb*<sup>+</sup> ID embryos. 10/19 of these embryos had a failure of secondary palate fusion  
442 (1/39 wild type ID controls, P<0.0001, Figure 5h), and a further 2 embryos had  
443 holoprosencephaly (Figure 5e,j). By contrast, only 1/18 *Dp1Tyb*<sup>+</sup> control embryos was  
444 dead at E15.5, and none of the survivors had oedema, holoprosencephaly or a failure of  
445 secondary palate fusion (Figure 5f). This induction of novel phenotypes is an indication  
446 that we have identified a *bona fide* gene-environment interaction, rather than a simple  
447 additive effect. We also assessed heart morphology in surviving embryos at E15.5. 16/18  
448 ID *Dp1Tyb*<sup>+</sup> ID embryos had heart defects (Extended Table 1), compared to 10/19  
449 *Dp1Tyb*<sup>-</sup> ID littermates (P=0.0186) and 1/16 *Dp1Tyb*<sup>+</sup> controls (P<0.0001). Furthermore,  
450 *Dp1Tyb*<sup>+</sup> ID embryos had significantly more AVSDs (10/18) than *Dp1Tyb*<sup>-</sup> ID embryos  
451 (3/19, P=0.0135), *Dp1Tyb*<sup>+</sup> control embryos (0/16, P=0.0003) or ID embryos (5/42,  
452 P=0.0008). Finally, 4/18 *Dp1Tyb*<sup>+</sup> ID embryos had type I PTA, which was never observed  
453 in *Dp1Tyb*<sup>-</sup> ID control, *Dp1Tyb*<sup>+</sup> control or wild type ID control embryos. Thus, we  
454 conclude that maternal ID leads to an increase in the penetrance and severity of heart  
455 defects in *Dp1Tyb*<sup>+</sup> mouse embryos. By contrast, there was no significant change in the  
456 prevalence of AA anomalies between *Dp1Tyb*<sup>+</sup> ID and *Dp1Tyb*<sup>-</sup> ID embryos (Extended  
457 Table 2). In conclusion, ID may be a significant modifier of heart, lymphatic and/or  
458 craniofacial phenotype in children with DS.

## 459 **Discussion**

460 Here, we have identified a completely new environmental teratogen: maternal ID anaemia.  
461 Clinically, this is potentially of great importance, since iron deficiency is the most common

462 micronutrient deficiency worldwide. We have shown in mice that maternal ID causes  
463 severe embryonic cardiovascular defects via premature differentiation of a subset of  
464 cardiac progenitor cells. At the molecular level, this most likely results from increased  
465 retinoic acid signalling. Furthermore, we show that the defects can be rescued by iron  
466 administration early in pregnancy, or by reducing vitamin A intake in iron deficient mothers.  
467 Although our results do not formally distinguish between ID or generalised anaemia as the  
468 cause of the defects, we believe it is more likely to be ID. The evidence for this is two-fold.  
469 Firstly, we have demonstrated that maternal ID phenocopies embryonic loss of CYP26  
470 activity in the heart, coronary vessels and lymphatic system, phenotypes that in each case  
471 result from increased embryonic RA signalling. CYP26 is an iron-dependent enzyme,  
472 therefore ID may well partially reduce its enzymatic activity, resulting in mildly increased  
473 RA signalling. Secondly, human epidemiological studies suggest that maternal anaemia  
474 only increases offspring CHD risk minimally (adjusted odds ratio (OR) 1.2<sup>74-76</sup>), whereas  
475 low iron intake in the first trimester (with or without overt anaemia) has an adjusted OR of  
476 offspring CHD of up to 5.0<sup>10</sup>. Our hypothesis that ID causes mildly increased RA signalling  
477 is supported by studies of the effects of exposure of pregnant mice to excess RA<sup>61-63,77</sup>.  
478 Here, administration of low doses of RA results in the same phenotypes as ID at E15.5,  
479 including isolated membranous VSD and DORV. By contrast, administration of high doses  
480 of RA causes TGA, which we did not observe in ID embryos. Furthermore, low doses of  
481 RA also cause highly similar morphological defects to ID earlier in development:  
482 shortening and rotational defects of the OFT at E10.5; hypoplasia and dysplasia of the  
483 proximal OFT cushions (but not the AVC cushions) and hypoplastic or absent aortic ICC at  
484 E12.5<sup>61-63</sup>; and thin ventricular myocardium at E13.5<sup>77</sup>. However, one feature of our  
485 hypothesis that is difficult to explain is why ID has a relatively minor effect on  
486 embryogenesis. Iron is required for the function of almost 400 human proteins<sup>78</sup>, and one  
487 might imagine that the activities of many of these proteins would also be affected in ID  
488 embryos. Why the CYP26 enzymes might be particularly sensitive to reduced iron levels in  
489 the embryo remains unclear.

490 Our observations have important clinical implications. We induced maternal ID via  
491 environmental modification. However, maternal ID can also arise from genetic insufficiency  
492 and this could potentially have similar effects on embryonic development. The induction of  
493 identical phenotypes in different individuals by genetic, environmental or gene-  
494 environment interaction is called phenocopying. This has previously been suggested to  
495 occur in some types of human congenital abnormalities, for example congenital NAD  
496 deficiency disorder<sup>79,80</sup>. Our results suggest that some cases of CHD or craniofacial  
497 defects might arise from maternal mutations in the almost 40 genes required for iron  
498 transport and/or metabolism. To address how common such mutations might be in  
499 humans, we examined the Genome Aggregation Database<sup>81</sup>. This is an aggregate of  
500 human exome and genome sequencing data from 141,456 individuals without severe  
501 paediatric diseases. We identified 771 predicted loss-of-function variants in these genes.  
502 Individuals carrying these variants might be predisposed to developing iron deficiency, and  
503 thus may have increased risk of having offspring with birth defects.

504 Our discoveries may also explain some of the variable penetrance of CHD and cleft palate  
505 in children with DS. Our unexpected observation of a strong gene-environment interaction  
506 resulting in a failure of secondary palate fusion supports our hypothesis that ID causes  
507 increased RA signalling. *Cyp26b1* null mouse embryos have fully-penetrant cleft  
508 palate<sup>82,83</sup>, and high maternal doses of Vitamin A can also induce cleft palate in mouse<sup>84</sup>.  
509 In addition, people with DS have an increased risk of cleft palate<sup>85</sup>. Thus the combination  
510 of mildly increased RA due to ID, combined with a genetic susceptibility due to DS, may  
511 explain our results. This hypothesis is further supported by the presence of PTA in some  
512 *Dp1Tyb*+ ID embryos. This phenotype is typical of offspring of mothers administered high

513 doses of RA<sup>61-63</sup>, but was not observed in ID alone or *Dp1Tyb*+ control embryos. However,  
514 the link between *Dp1Tyb* and RA signalling is not obvious. The duplicated region contains  
515 172 protein coding genes, of which at least three have been associated with RA signalling:  
516 *Nrip1*, *Runx1* and *Ripply3*. Intriguingly, *Ripply3* is a transcriptional co-repressor of *Tbx1*<sup>86</sup>  
517 and is a direct target of RA signalling<sup>87</sup>. Thus, in *Dp1Tyb*+ ID embryos, slightly increased  
518 RA signalling coupled with an extra copy of *Ripply3*, may cause repression of *Tbx1* target  
519 genes, resulting in a phenocopy of *Tbx1* null phenotypes including cleft palate<sup>88</sup> and more  
520 severe cardiovascular defects. Finally, the clinical relevance of our gene-environment  
521 interaction observations could be relatively easily tested by a prospective clinical study  
522 examining the clinical effects of maternal peri-conception iron status on the phenotypes of  
523 children with DS.

524 If maternal ID does indeed lead to increased RA signalling in the embryo, then ID may  
525 have a particularly great impact on women with severe cystic acne. Isotretinoin  
526 (Roaccutane®) is a common and effective treatment for this condition, but it is well-known  
527 that this isoform of RA is highly teratogenic<sup>42</sup>. Our results suggest that ID may further  
528 exacerbate the teratogenicity of isotretinoin. Best practice indicates use of two reliable  
529 methods of contraception for one month before starting treatment, and for one month after  
530 treatment has stopped. However, there is evidence of a significant non-compliance rate in  
531 these patients<sup>89</sup>, and thus it might be of benefit for patient iron status to be monitored  
532 during treatment to reduce the potential effects of excess RA on an unintended pregnancy.

533 Our finding that combined iron and vitamin A deficiency substantially rescues the  
534 cardiovascular defects may explain the disparity between animal experiments and  
535 epidemiological studies of VAD. There is very strong evidence in animal models that VAD  
536 alone is highly teratogenic, but epidemiological studies to date have not found a  
537 particularly strong association between VAD and CHD. In the developing world, 15% of  
538 pregnant women have VAD<sup>90</sup> and these women also commonly have ID as well. Our  
539 results might suggest that the combination of iron and vitamin A deficiency will balance RA  
540 levels, and thus mask any effect of VAD alone on CHD prevalence.

541 Studies of genetic causes of birth defects are useful on a case-by-case basis to provide  
542 information on prognosis, treatment options and recurrence rate. However, understanding  
543 particular genetic causes of birth defects has limited value in reducing their overall birth  
544 prevalence. By contrast, our elucidation of ID as a potential new environmental risk and/or  
545 modifying factor for CHD may guide changes in clinical advice. Current WHO and NICE  
546 guidelines have conflicting advice on iron supplementation during pregnancy, with the  
547 WHO recommending daily iron supplementation to all pregnant women, whereas NICE  
548 recommends supplementation only in cases of substantial ID<sup>91,92</sup>. Our results suggest that  
549 all women of child-bearing age should be advised to maintain optimal iron levels. This  
550 conclusion is supported by a recent study suggesting that low iron intake during early  
551 pregnancy in humans increases the risk of offspring CHD by up to 5-fold<sup>10</sup>. Iron  
552 supplementation during pregnancy is unlikely to have a deleterious effect on embryonic  
553 development. Pregnant mice loaded with excess iron have increased levels of the  
554 hormone hepcidin. Hepcidin prevents the release of excess iron into the maternal  
555 circulation, and these increased levels protect her embryos from iron overload<sup>60</sup>. Thus,  
556 recommending iron administration as soon as pregnancy is suspected may be a safe and  
557 effective strategy for reducing risk of CHD worldwide.

558 **Figure 1. Maternal ID causes embryonic defects and lethality.** (a-b) Embryos from ID  
 559 mothers have gross sub-cutaneous oedema. Representative control (a) and ID (b)  
 560 embryos. (c) Histograms of a developmental time-course showing significant embryonic  
 561 lethality from E12.5. (d-g) Representative frontal H&E sections of hearts from control (d)  
 562 and ID (e-g) E15.5 embryos. VSD (black arrows), AVSD (yellow arrow), thin ventricular  
 563 myocardium (black arrowheads) and disorganised ventricular septum (yellow arrowheads)  
 564 are indicated. (h-q) Abnormal cushion formation in E12.5 ID embryos. (h-l) Representative  
 565 3D Amira reconstructions of OFT cushions from manually-segmented HREM data showing  
 566 dorsal (h-l) and ventral (h'-l') views of (h) E12.5 control embryo, (i) normally-rotated OFT  
 567 from E12.5 ID embryo, (j) partially-rotated OFT from E12.5 ID embryo, (k) non-rotated OFT  
 568 from E12.5 ID embryo, (l) E11.5 control embryo. The left OFT cushion (yellow), right OFT  
 569 cushion (green), aortic ICC (pink) and pulmonary ICC (blue) are shown. White arrows  
 570 indicate unfused proximal cushions. (m-q) 3D reconstructions of the AV cushions showing  
 571 dorsal (m-q) and ventral (m'-q') views from the same embryos. The superior AV cushion  
 572 (red), inferior AV cushion (cyan), left lateral AV cushion (orange) and right lateral AV  
 573 cushion (purple) are shown. Yellow arrows indicate non-touching AV cushions. Scale bar =  
 574 2 mm (a,b) and 200  $\mu$ m (d-g).

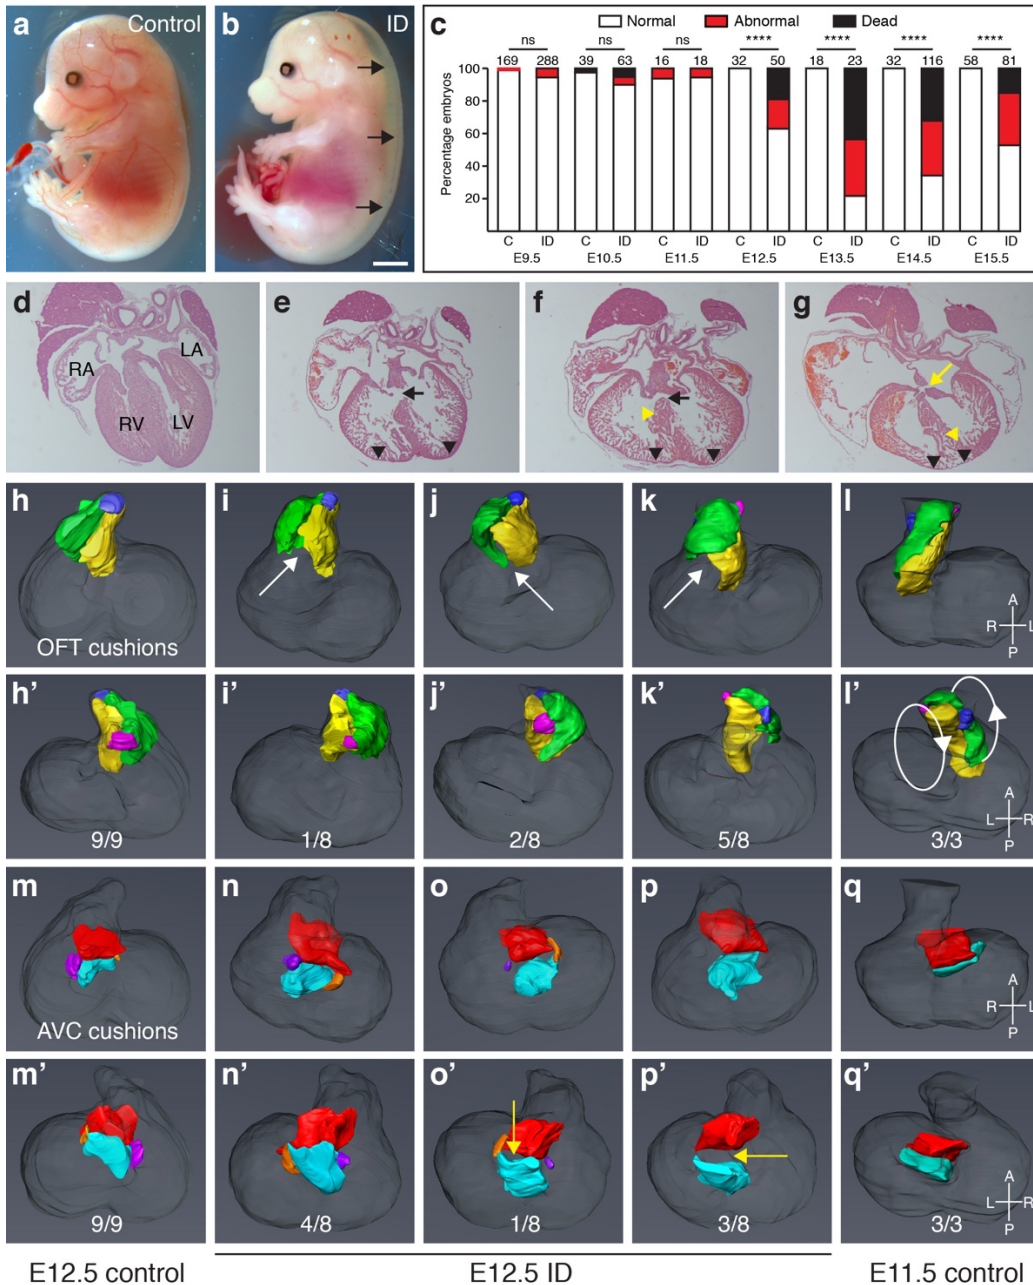

576 **Figure 2. Maternal ID causes aortic arch abnormalities**

577 Comparison of aortic arch artery morphology between control (a,c,e,g) and ID (b,d,f,h)  
578 embryos. Representative 3D Amira reconstructions from manually-segmented HREM data of  
579 early E10.5 (a,b), late E10.5 (c,d), E12.5 (e,f) and E15.5 (g,h) embryos. For clarity of  
580 PAA identity, 3D models of E10.5 embryos are overlaid onto a sagittal section of the same  
581 embryo (a'-d'). Persistent PAA2 (panel b', black arrow), interrupted PAA4 and PAA6 (panel  
582 d, white arrows), persistent right dorsal aorta (panel f, orange arrow) and aberrant right  
583 subclavian artery (panel h, yellow arrow) are indicated. da = dorsal aorta; oft = outflow  
584 tract; ao = aorta; pt = pulmonary trunk; rsa = right subclavian artery; rcc = right common  
585 carotid artery; lcc = left common carotid artery; lsa = left subclavian artery; ad = arterial  
586 duct.

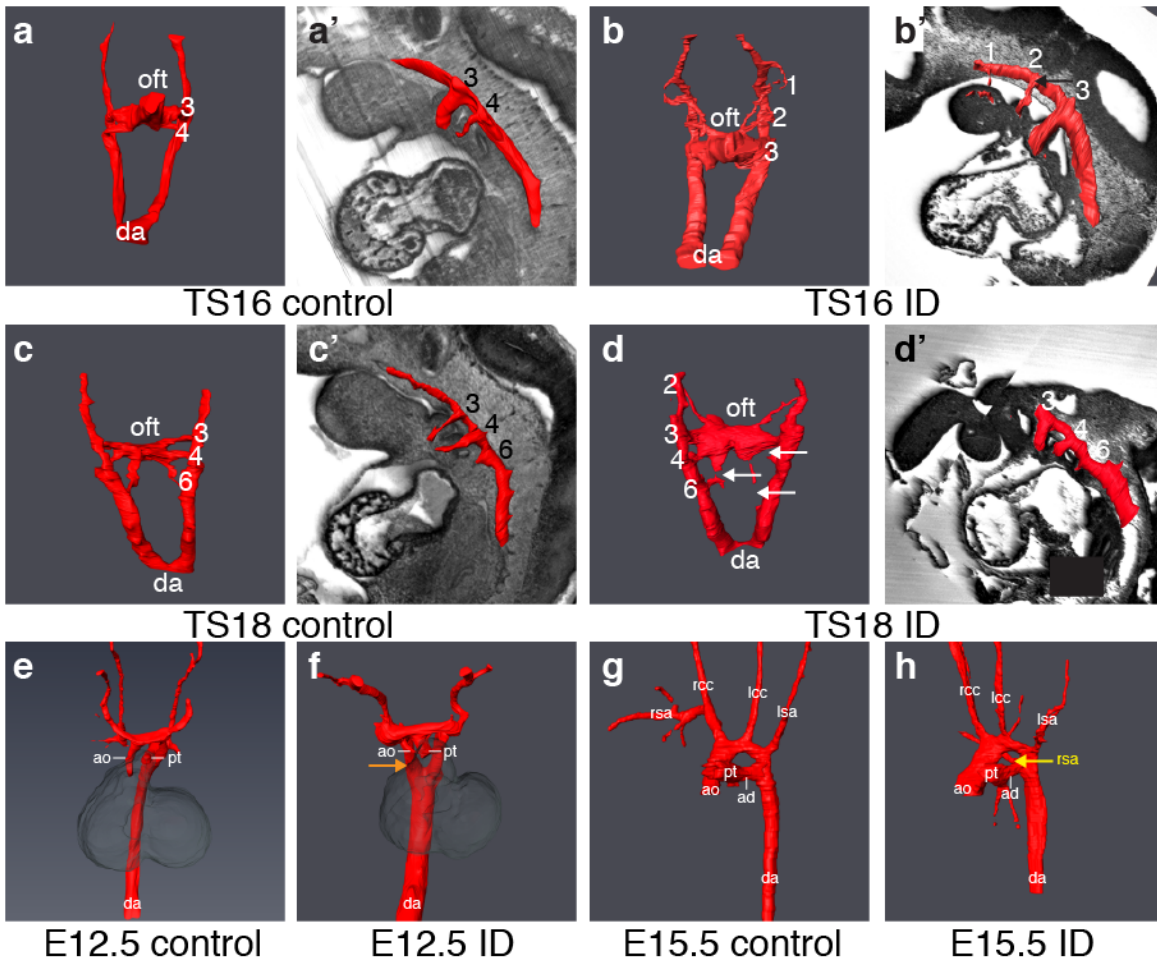

587

588

589 **Figure 3. Effects of ID on cardiac progenitors and RA signalling.** (a-e) Comparison of  
 590 expression levels of the myocyte differentiation marker MHC (green) in sagittal sections of  
 591 control (a,a') and ID (b,b') E9.5 mouse embryos by immunohistochemistry. Nuclei were  
 592 stained with TO-PRO-3 (magenta). Location of the SHF is indicated by brackets. (c,c')  
 593 Diagrams indicating the relative positions of the SHF (dark blue), pharyngeal endoderm  
 594 (green), OFT (light blue) and left ventricle (V, red) and left atrium (A, orange) in a sagittal  
 595 section of an E9.5 embryo. Quantification of length of MF20-positive SHF (d) and number  
 596 of MHC-positive cells in the SHF (e). (f-h) Comparison of expression levels of GATA4  
 597 (green) in control (f,f') and ID (g,g') E9.5 mouse embryos by immunohistochemistry. Nuclei  
 598 were stained with TO-PRO-3 (magenta). Location of the SHF is indicated by brackets. (h)  
 599 Quantification of length of GATA4-positive SHF. (j-m) Comparison of RA signalling levels  
 600 in control (j,l) and ID (k,m) E9.5 embryos carrying the RARE-LacZ reporter allele. (j,k)  
 601 Sagittal sections of E9.5 embryos stained with X-gal in wholemount. Location of the SHF is  
 602 indicated by brackets. Increased and patchy staining in the OFT (arrows) and increased  
 603 staining in the ventricle (arrowhead) are indicated. (l,m) Representative 3D Amira  
 604 reconstructions of X-gal staining (red) from automatically thresholded two-channel HREM  
 605 data derived from E9.5 embryos stained in wholemount. The embryos are shown in  
 606 transparent grey. \*\*\* P<0.001, \*\*\*\* P<0.0001. Scale bar = 130  $\mu$ m (a,b,f,g) and 95  $\mu$ m (j,k).

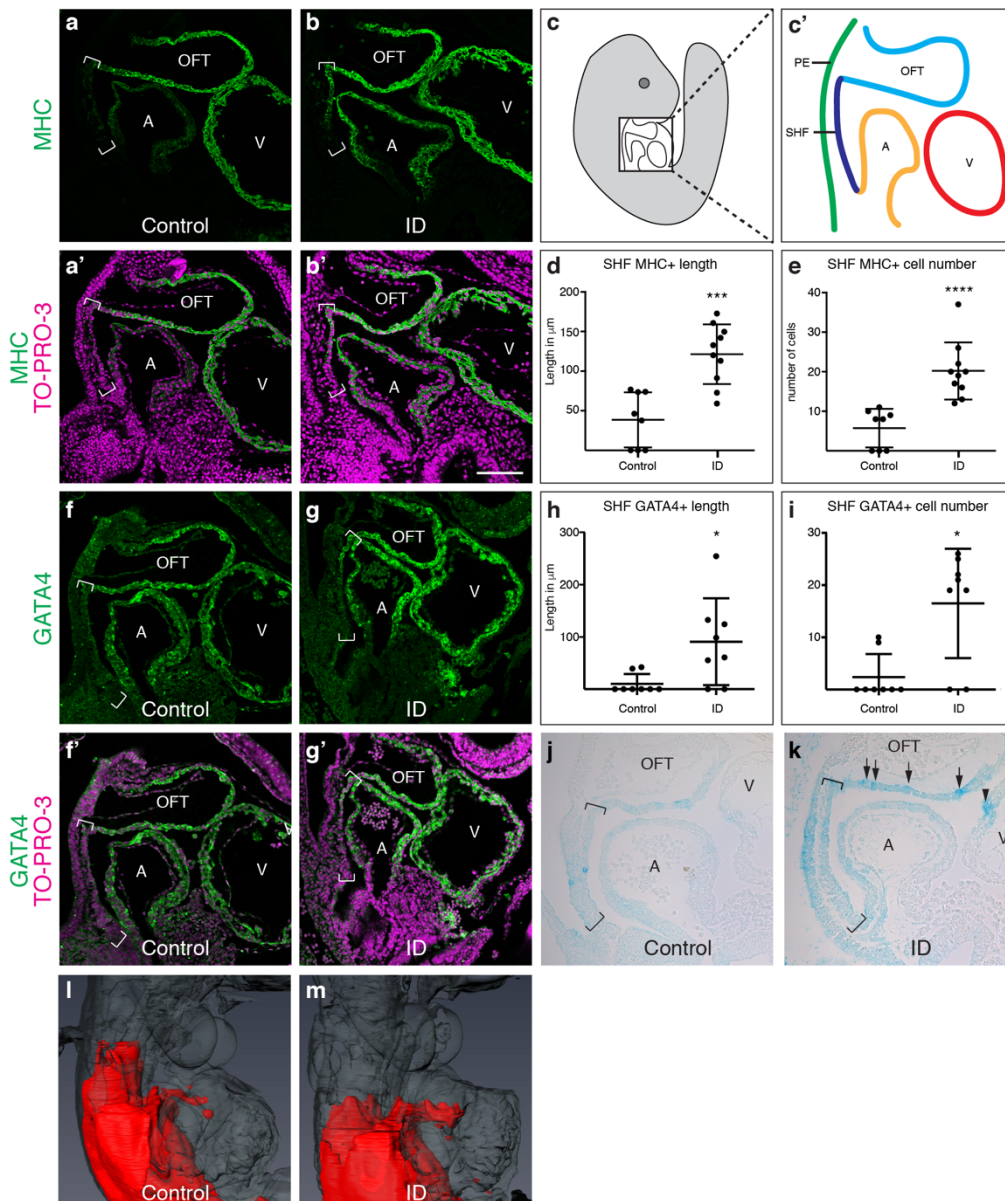

608 **Figure 4. Lymphatic and coronary vasculature development is perturbed in ID**  
609 **embryos.** (a-m) Lymphatic development. (a-d) Comparison of NRP2, PROX1 and CD31  
610 expression in back skin from control (a) and ID (b) E14.5 embryos. Magnified views of the  
611 boxed areas are shown in panels a'-a''' and b'-b''', respectively. Quantification of the  
612 average lymphatic vessel width (c) and average intervessel distance (d). (e-h) Comparison  
613 of RA signalling levels in frontal sections of control (e) and ID (g) E11.5 embryos carrying  
614 the RARE-LacZ transgene. (f,h) Magnified views of the boxed areas in e and h,  
615 respectively. (i-r) Coronary vasculature development. Comparison of CD31 staining of  
616 E14.5 hearts from control (i,k) and ID (j,l). Black arrows indicate endothelial nodules.  
617 Quantitation of endothelial nodule number on the dorsal (q) and ventral (r) surfaces. (m-p)  
618 Comparison of CD31 (green) expression in the coronary vasculature of control (m) and ID  
619 (o) E17.5 embryos. Nuclei were stained with TO-PRO-3 (magenta). Magnified views of the  
620 boxed areas are shown in panels n and p, respectively. White arrows indicate ectopic  
621 CD31 staining. ns, not significant, \*\* P<0.01, \*\*\* P<0.001. Scale bar = 715  $\mu$ m (a,b); 370  
622  $\mu$ m (a'-b'''); 755  $\mu$ m (e,g); 95  $\mu$ m (f,h); 680  $\mu$ m (i-l); 640  $\mu$ m (m,o); 64  $\mu$ m (n,p). CV,  
623 cardinal vein; DA, dorsal aorta.

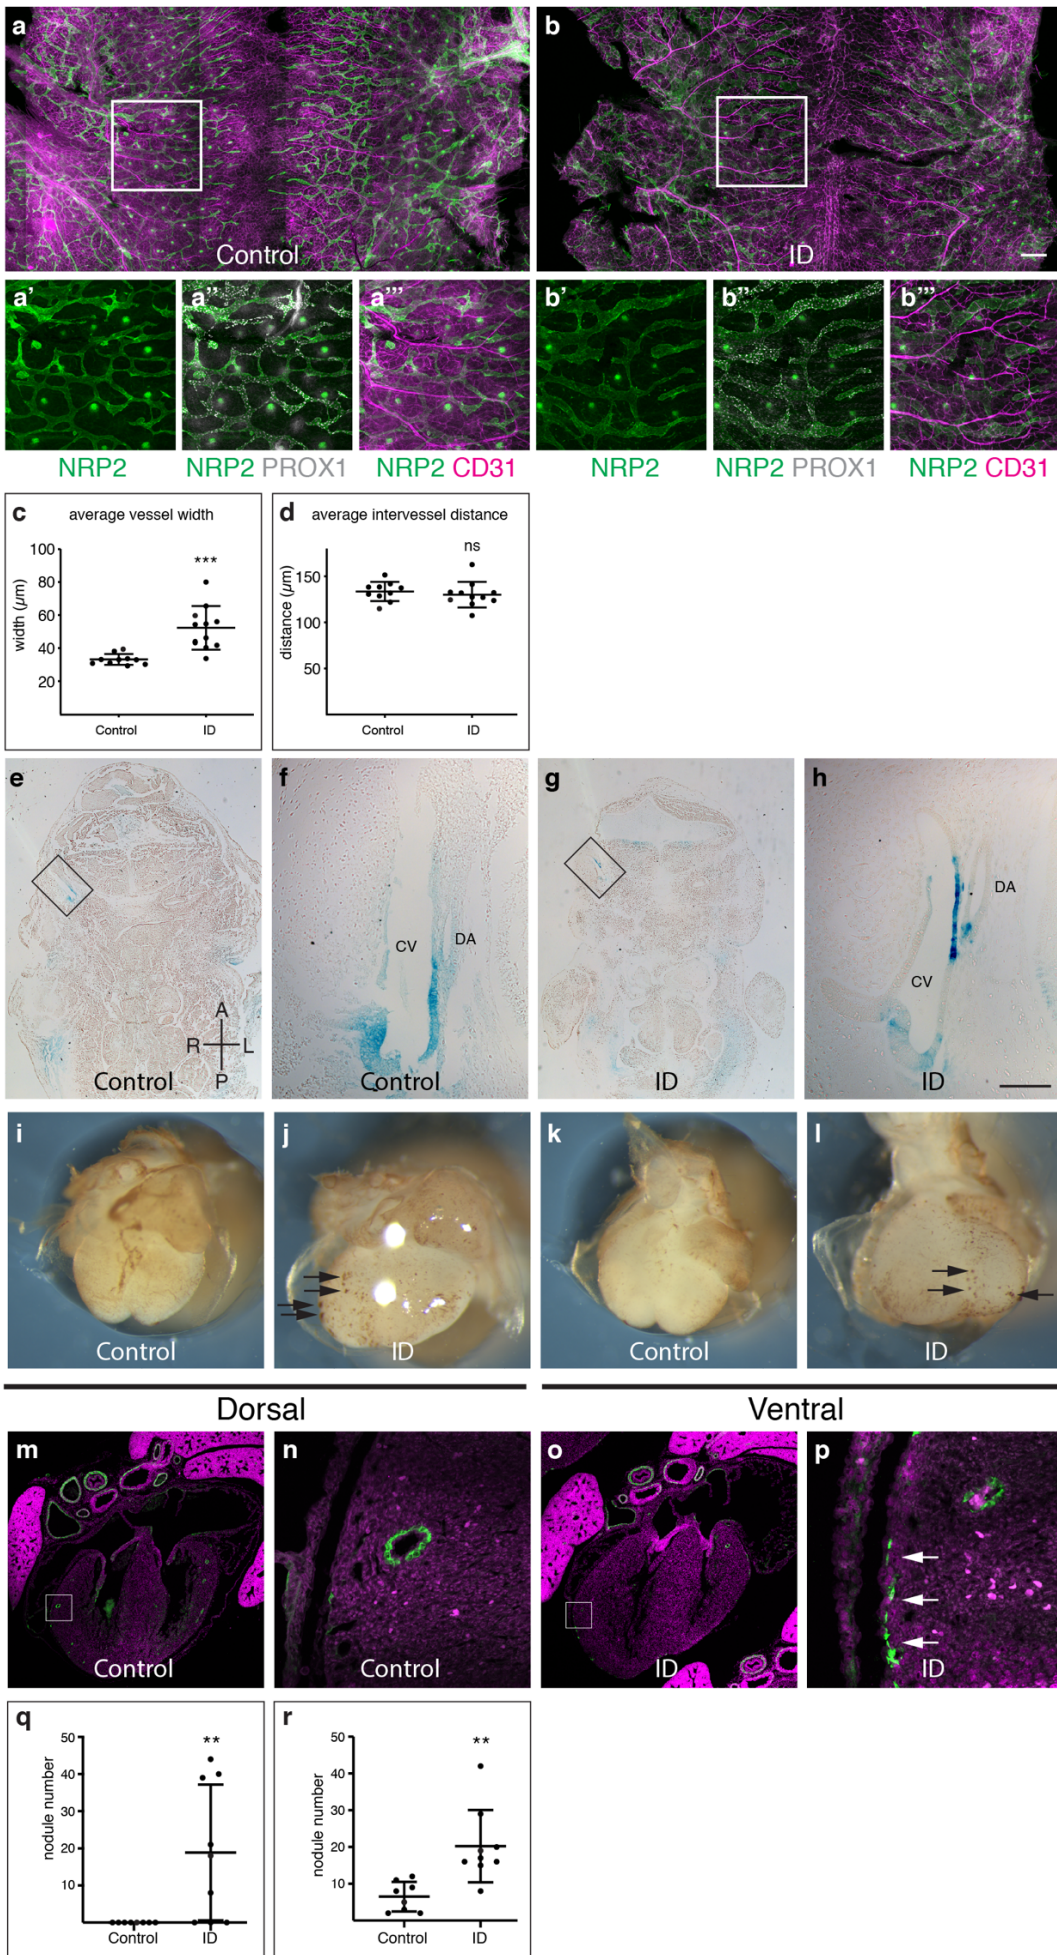



625 **Figure 5. Phenotypic rescue and gene-environment interaction.** (a) Phenotypic  
 626 rescue. Pregnant mice were returned to iron-replete diet between E7.5-E9.5 or fed  
 627 continuously on an iron and vitamin A deficient diet from weaning and throughout  
 628 pregnancy (ID/VAD). Histograms showing the percentage of embryos that were dead,  
 629 abnormal or normal at E15.5. (b) Investigation of gene-environment interaction. Iron  
 630 deficient (ID) and control (C) C57BL/6J females were crossed with males carrying the  
 631 *Tbx1*<sup>null</sup> allele (T), or the *Dp1Tyb* duplication (DS). Histograms showing the percentage of  
 632 embryos that were dead, abnormal or normal at E15.5. (c-f) Representative images of  
 633 *Dp1Tyb*<sup>+</sup> control (c), *Dp1Tyb* control ID (d), *Dp1Tyb*<sup>+</sup> ID with holoprosencephaly (e),  
 634 *Dp1Tyb*<sup>+</sup> control (f), E15.5 embryos. (g-j) *Dp1Tyb*<sup>+</sup> embryos from ID mothers have  
 635 craniofacial defects. Representative 3D reconstructed frontal sections of HREM data from  
 636 *Dp1Tyb*<sup>-</sup> ID (g,i) and *Dp1Tyb*<sup>+</sup> ID (h,j) E15.5 embryos showing examples of failed  
 637 secondary palate fusion (h, yellow arrow) and holoprosencephaly (j). (g'-j') Sagittal  
 638 sections from the same embryos showing the location of the sections in g-j (red lines).  
 639 note that panels g and i are the same control embryo. T, tongue. ns, not significant, \*\*  
 640 P<0.01, \*\*\* P<0.001, \*\*\*\* P<0.0001. Scale bar = 2 mm (c-f); 700 μm (g,h); 1.2 mm (i,j); 1.6  
 641 mm (g'-l').

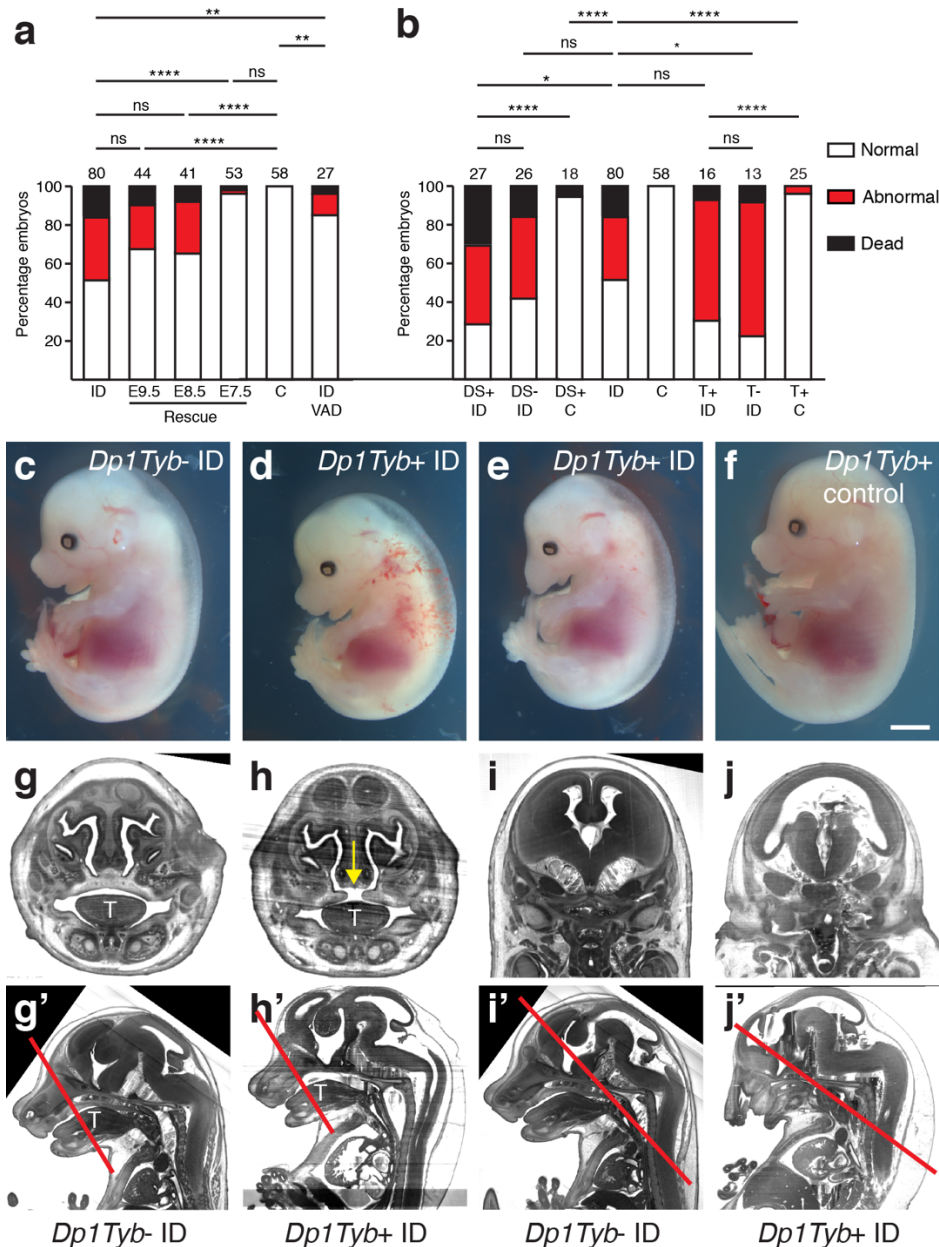

643 **Extended Figure 1. Mice and embryos continuously fed a low iron diet from weaning**  
644 **are ID and anaemic.** (a) Comparison of blood haemoglobin concentrations between adult  
645 female mice fed since weaning on control (200 ppm iron) or low iron (2-6 ppm iron) diet.  
646 (b) Comparison of Fe<sup>56</sup> concentration in liver samples measured by Inductively Coupled  
647 Plasma Mass Spectrometry. (c-e) Representative images showing relative DAB-enhanced  
648 Perls staining of liver sections from control (c) or ID (d) mice. (e) Quantitation of Perls  
649 staining. (f-h) Representative images showing relative liver MRI contrast from control (f) or  
650 ID (g) E15.5 embryos. The embryonic liver is shown by a red arrow. (g) Quantitation of  
651 liver MRI contrast. (i) Comparison of litter size (including dead embryos) in ID mothers  
652 between E10.5 and E15.5. ns, not significant, \*\*\* P<0.001, \*\*\*\* P<0.0001. Scale bars are  
653 50  $\mu$ m (c,d) and 3 mm (f,g).

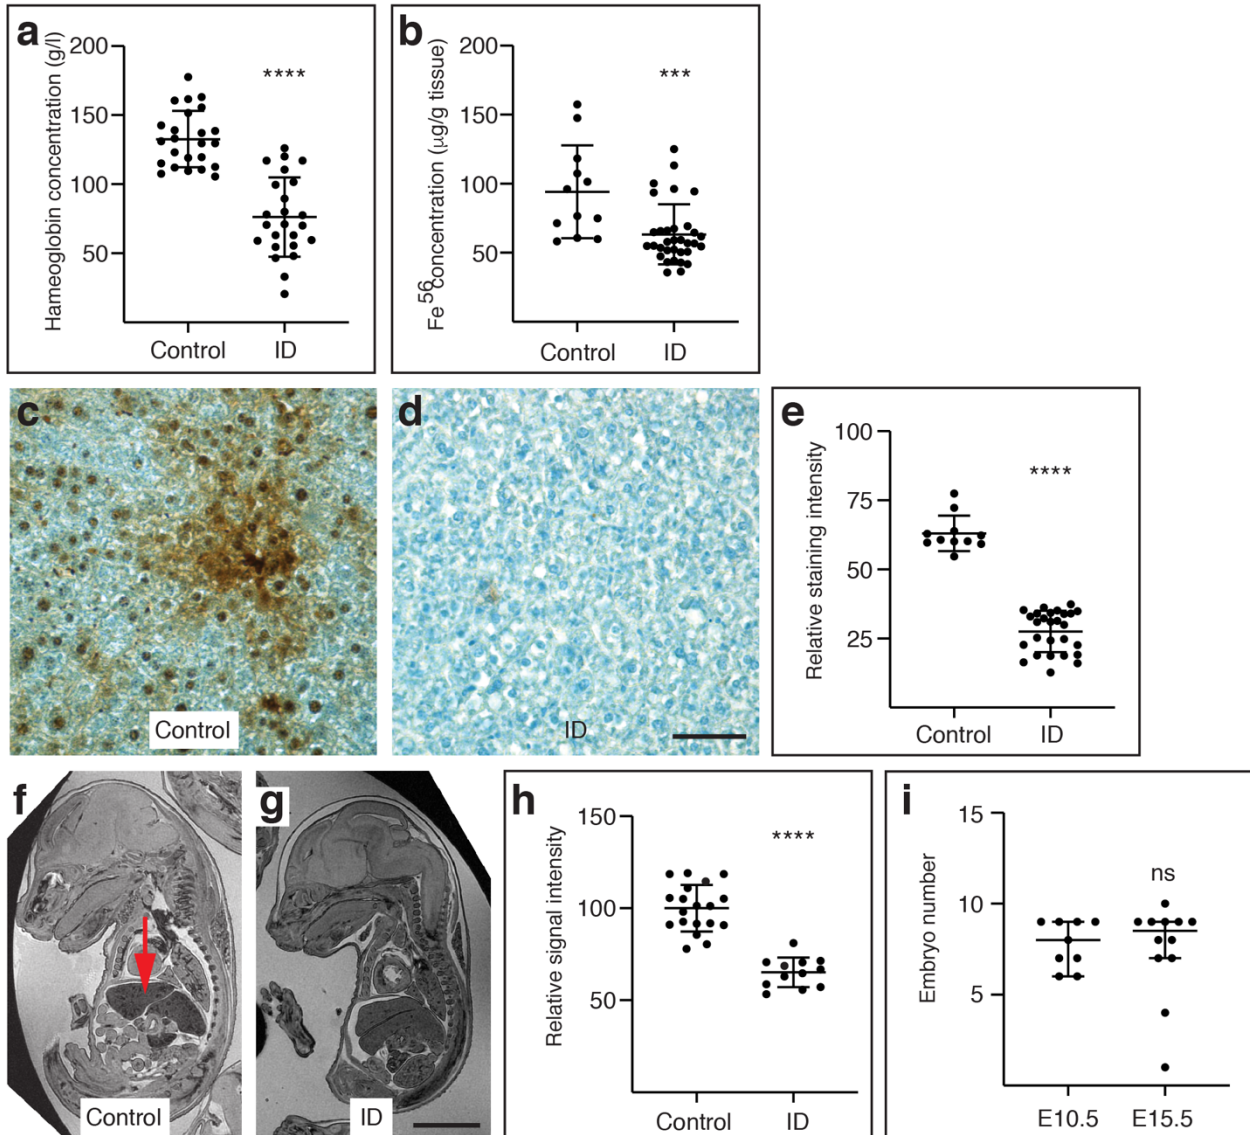

654

655

656 **Extended Figure 2. Maternal ID causes cardiovascular defects.**

657 (a) Quantification of the ventricular myocardial thickness of hearts from E15.5 control and  
658 ID embryos. (b-c) Quantification of length (b) and angle between distal and proximal  
659 portions of the OFT (c) from control and ID E10.5 embryos. (d-l) Quantitation of whole  
660 ventricle and cardiac cushion volumes from 3D Amira models of manually-segmented  
661 HREM data from E12.5 embryos. The panel border colour corresponds to the cushion  
662 colour in Figure 1 (panels h-q). \* P<0.05, \*\* P<0.01, \*\*\* P<0.001, \*\*\*\* P<0.0001.

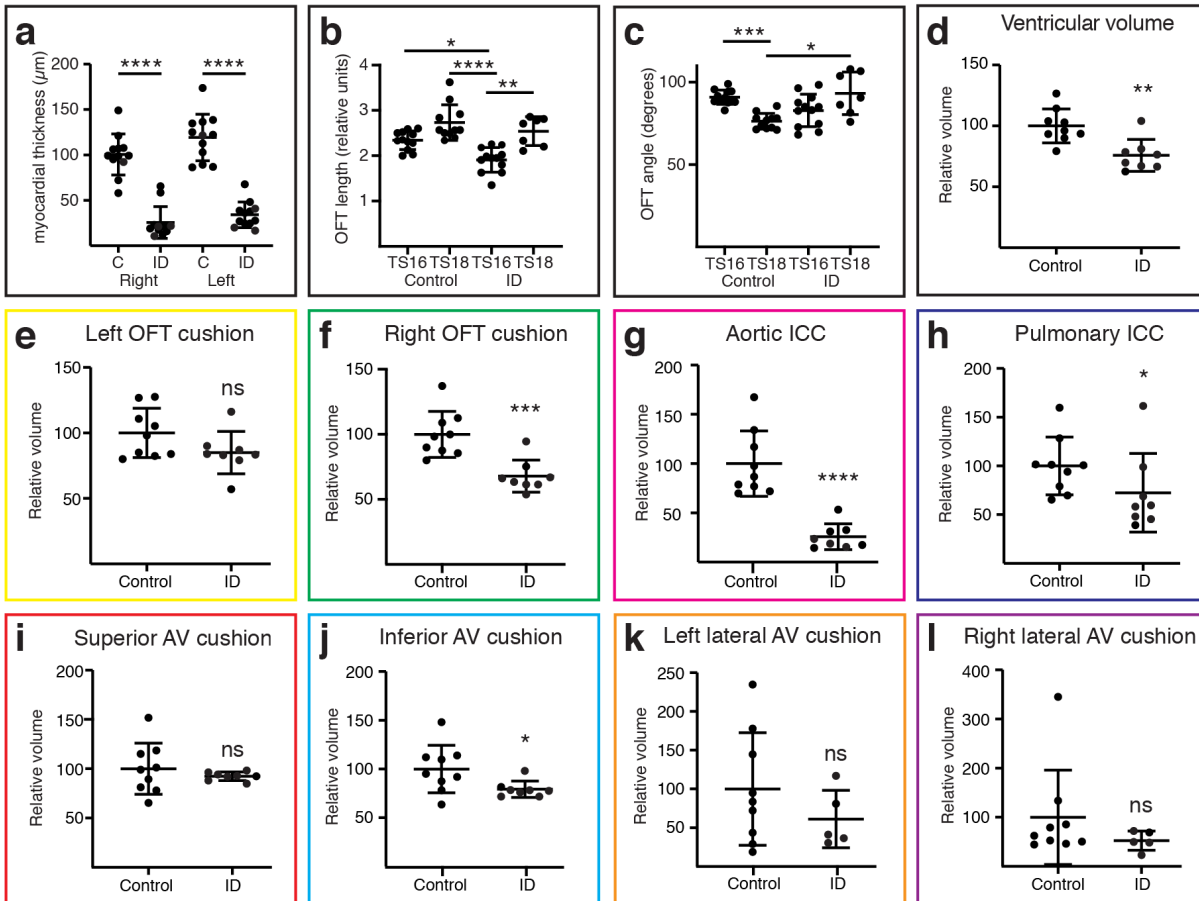

664 **Extended Figure 3. Transcriptomic analysis of anterior SHF cells.** (a) Representative  
665 E9.5 embryo showing the expression domain of the Mef2c-AHF-GFP transgene. Scale bar  
666 is 500  $\mu\text{m}$ . (b) Unsupervised hierarchical clustering using normalised gene expression  
667 levels ordered samples into the correct condition groups. Only differentially expressed  
668 genes are shown with adjusted p value  $<0.01$ ,  $B >1$  and differentially expressed  $<> 2$ -fold.  
669 (c) Comparison of genes differentially expressed relative to control samples shows little  
670 overlap between ID and hypoxia samples. Analysis was restricted to genes with adjusted p  
671 value  $<0.01$ ,  $B >1$  and differentially expressed  $<> 2$ -fold. (d) Comparison of expression  
672 changes relative to control samples of ID and hypoxia samples. Heat maps show the  
673 average fold-change between ID or hypoxia and control samples of selected genes  
674 involved in the hypoxia response, the unfolded protein response, cell cycle control, cardiac  
675 muscle proteins and GATA4 direct targets. (e) The ID transcriptome is more closely  
676 related to the OFT cluster than the aSHF cluster from single-cell RNA-Seq of heart and  
677 cardiac progenitor cells at E9.25 (de Soysa et al<sup>33</sup>). Heat maps show every gene in each  
678 de Soysa cluster with significant ( $p < 0.05$ ) fold-change between ID and control samples.  
679 Statistical significance was tested using a hypergeometric test (assuming 20,000 genes in  
680 the transcriptome) with Bonferroni correction to control the familywise error rate. P values:  
681 OFT  $3.58 \times 10^{-6}$ ; RV  $3.29 \times 10^{-4}$ ; aSHF  $3.54 \times 10^{-4}$ ; pSHF  $1.87 \times 10^{-3}$ ; LV  $1.05 \times 10^{-2}$ ). aSHF,  
682 anterior second heart field; pSHF, posterior second heart field; OFT, outflow tract; RV,  
683 right ventricle; LV, left ventricle.

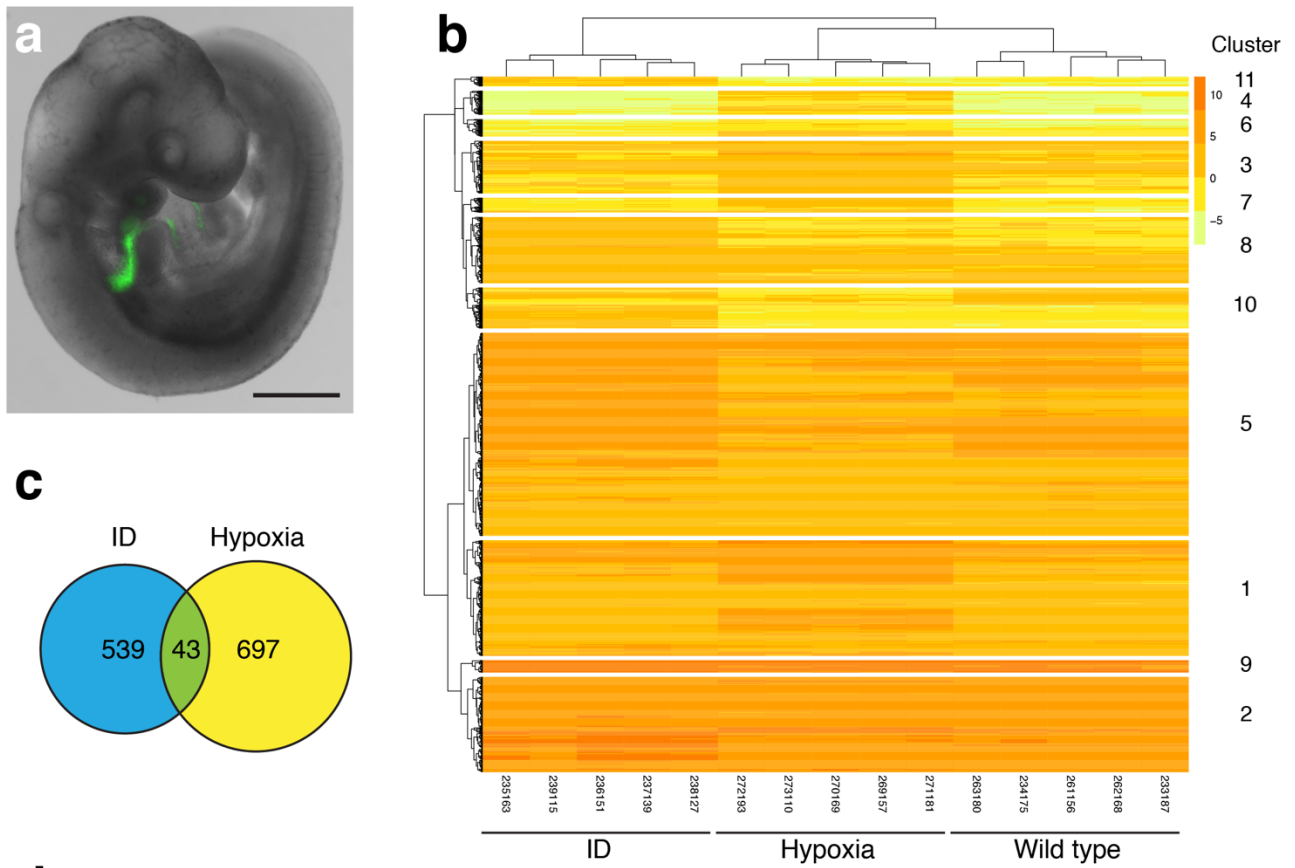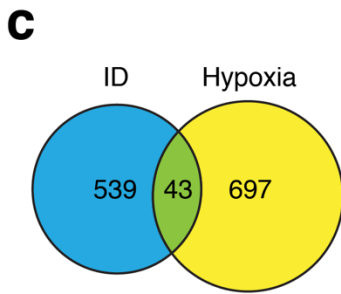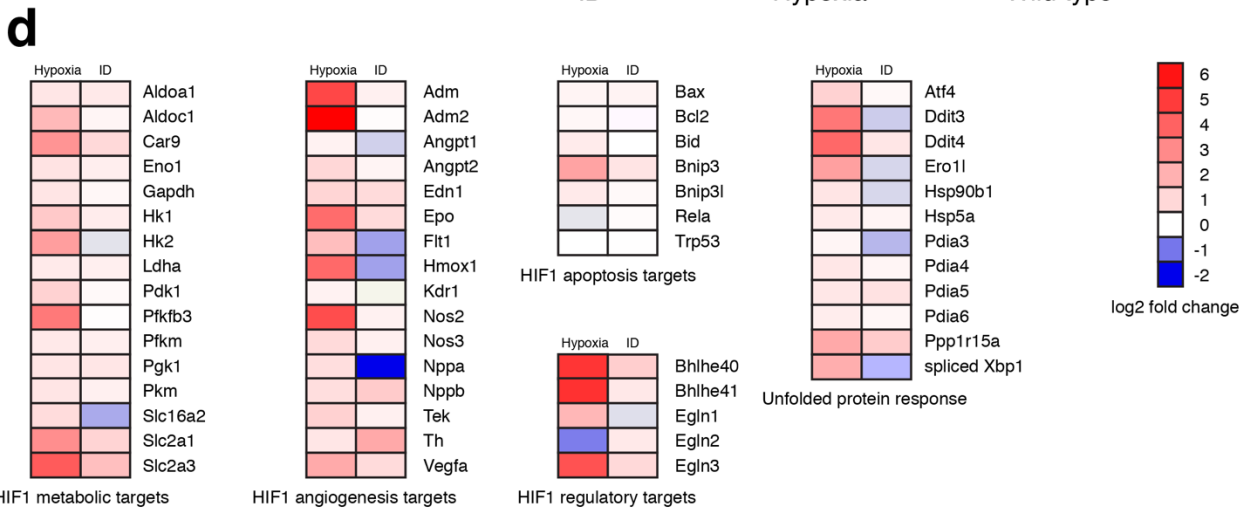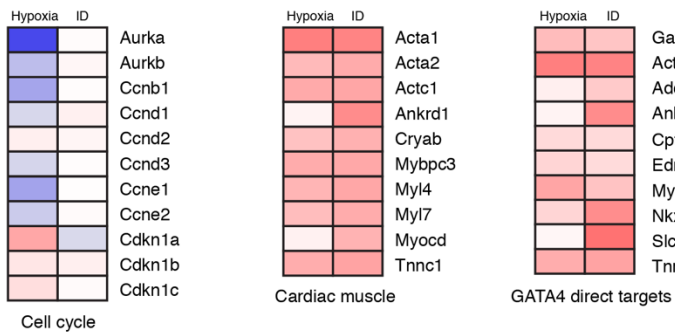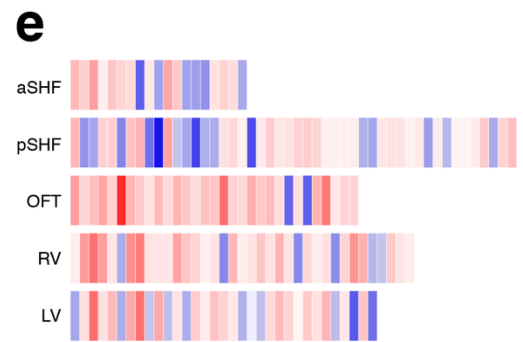

686 **Extended Figure 4. Effects of ID on cardiac progenitor proliferation, TBX5**  
687 **expression and skeletal patterning.** (a-d) Comparison of expression levels of phospho-  
688 Histone H3 (pHH3, green) in sagittal sections of control (a) and ID (b) E9.5 mouse  
689 embryos by immunohistochemistry. Nuclei were stained with TO-PRO-3 (magenta).  
690 Location of the SHF is indicated by brackets. (c,c') Diagrams indicating the relative  
691 positions of the SHF (dark blue), pharyngeal endoderm (green), OFT (light blue) and left  
692 ventricle (V, red) and left atrium (A, orange) in a sagittal section of an E9.5 embryo. (d)  
693 Quantification of number of pHH3-positive SHF cells. (e-g) Comparison of expression  
694 levels of TBX5 (magenta) and NKX2-5 (green) in control (e) and ID (f) E9.5 mouse  
695 embryos by immunohistochemistry. Location of the SHF is indicated by brackets. (g)  
696 Quantification of the percentage of TBX5-positive SHF. (h,i) Alcian blue staining of  
697 cartilage in control (h) and ID (i) E14.5 embryos. Missing pedicles (black arrows) and rib  
698 (yellow arrow) are indicated. ns = not significant. Scale bar = 130  $\mu$ m (a,b,e,f), 520  $\mu$ m  
699 (h,i).

700  
701

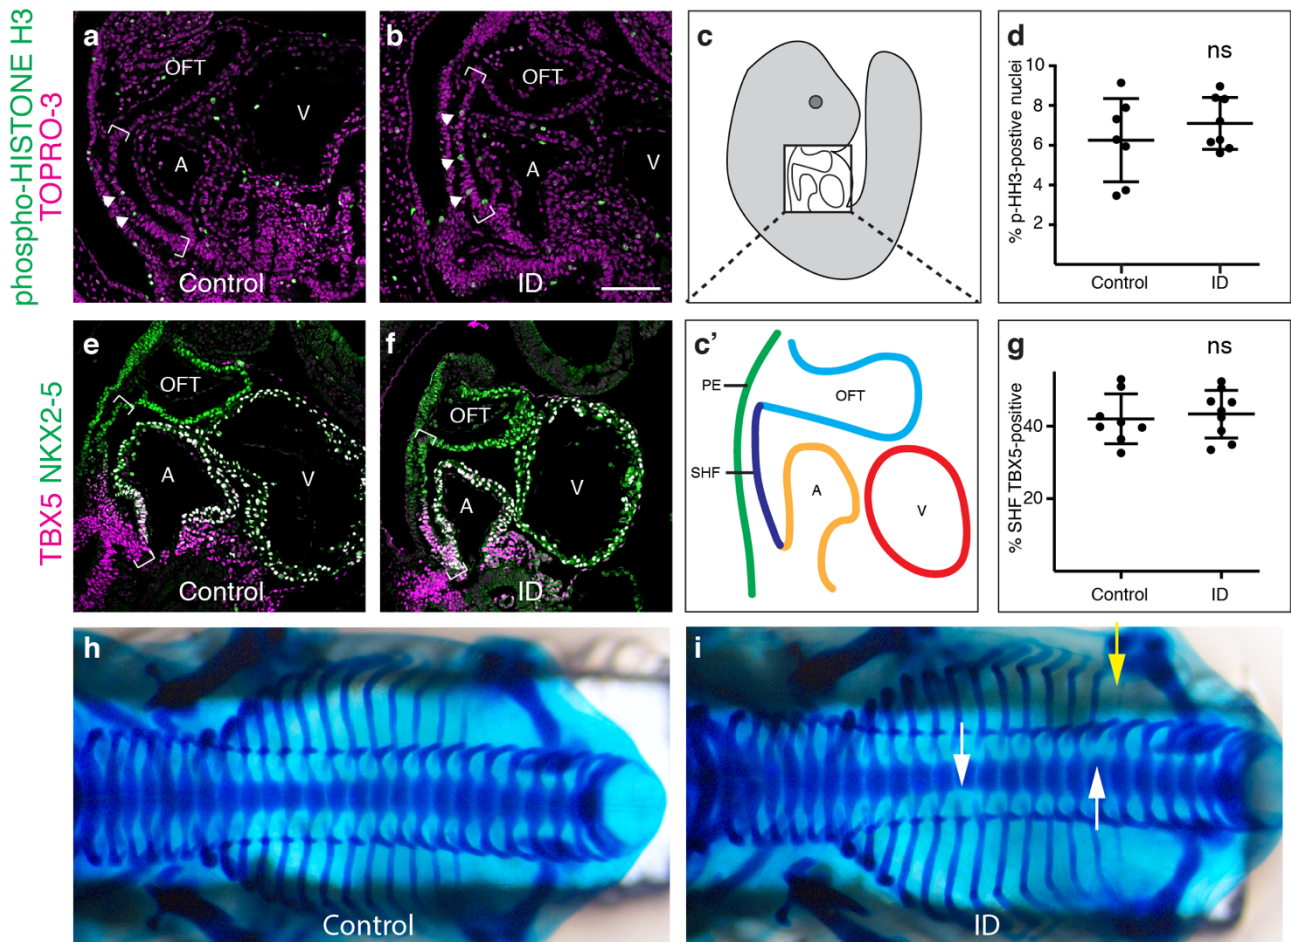

704 **Extended Figure 5. Effects of maternal diet**  
705 **on blood haemoglobin levels and**  
706 **embryonic liver iron.** (a) Blood haemoglobin  
707 concentrations in pregnant adult C57BL/6J  
708 strain female mice measured at E15.5. C, mice  
709 fed control diet; E9.5, E8.5, E7.5, mice fed  
710 from weaning on a low iron diet, then returned  
711 to control diet at the indicated stage of  
712 pregnancy; ID/VAD, mice fed from weaning on  
713 a low iron and Vitamin A-deficient diet; ID,  
714 mice fed from weaning on a low iron diet. DS =  
715 C57BL/6J females crossed to *Dp1Tyb*<sup>+</sup> males;  
716 *Tbx1* = C57BL/6J females crossed to *Tbx1*<sup>+/-null</sup>  
717 males. (b-e) Representative images showing  
718 relative liver MRI contrast in E15.5 embryos  
719 from (b) ID mothers returned to control diet on  
720 E7.5; (c) mothers fed a low iron and vitamin A-  
721 deficient diet; (d) *Dp1Tyb*<sup>+</sup> embryos from ID  
722 mothers; (e) *Tbx1*<sup>+/-null</sup> embryos from an ID  
723 mother. The embryonic livers are shown by a  
724 white arrow. Scale bar = 3 mm.

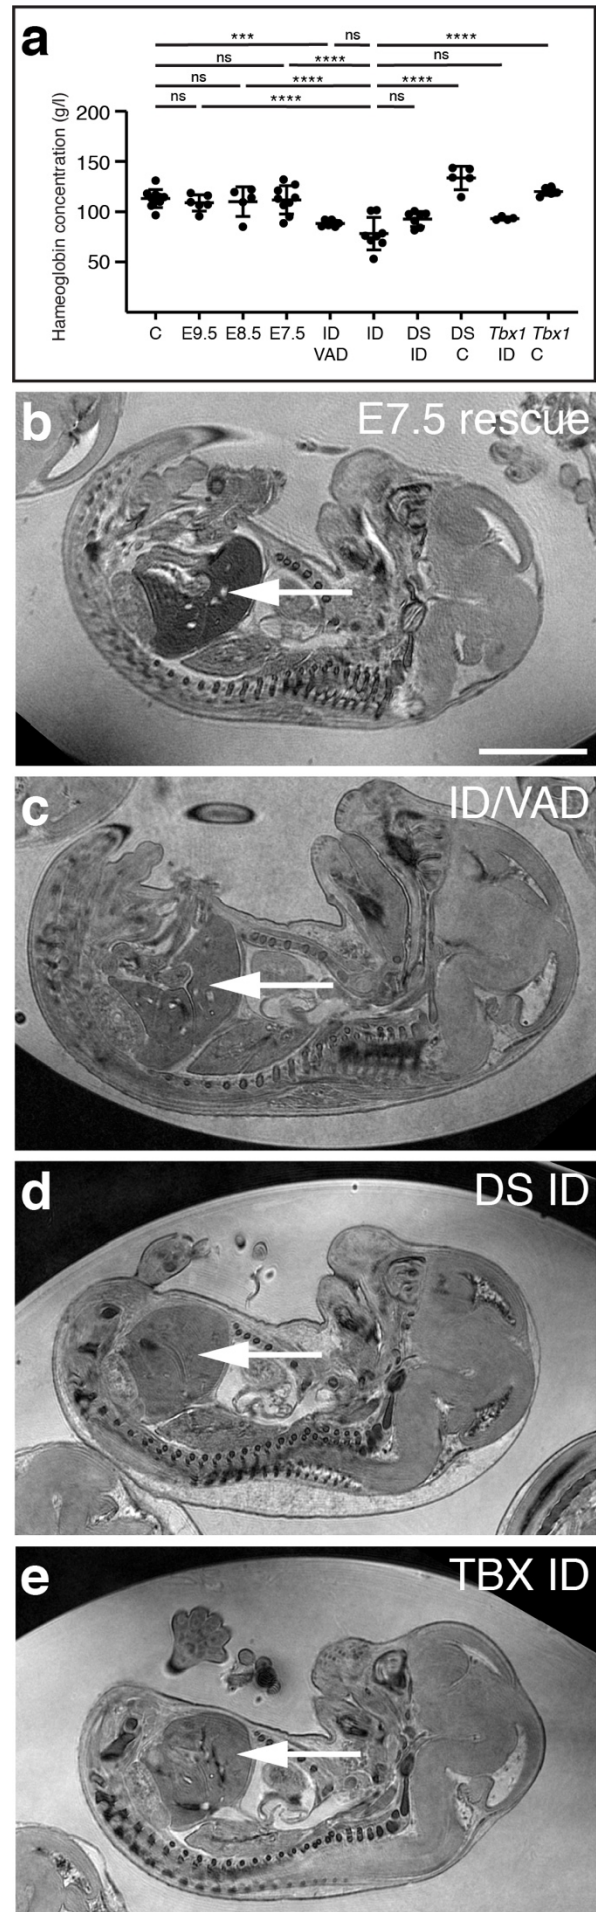





726 **Extended Table 1. Summary of types of heart defects observed in E15.5 embryos.** ASD, atrial septal defect; mVSD: membranous  
 727 ventricular septal defect; musVSD: muscular ventricular septal defect; AVSD, atrioventricular septal defect; OFT, outflow tract defects  
 728 (includes overriding aorta and double-outlet right ventricle); PTA, persistent *truncus arteriosus*. † one with type I PTA; ‡ three with type I  
 729 PTA  
 730

| Types of defects   |                      | Control | ID      | E7.5 rescue | ID/VAD |                                   | <i>Dp1Tyb+</i> ID | <i>Dp1Tyb-</i> ID | <i>Dp1Tyb+</i> control |                                                         | <i>Tbx1</i> <sup>+/<i>null</i></sup> ID | <i>Tbx1</i> <sup>+/+</sup> ID | <i>Tbx1</i> <sup>+/<i>null</i></sup> control |
|--------------------|----------------------|---------|---------|-------------|--------|-----------------------------------|-------------------|-------------------|------------------------|---------------------------------------------------------|-----------------------------------------|-------------------------------|----------------------------------------------|
| Single             | ASD                  | 0       | 0       | 0           | 0      |                                   | 0                 | 0                 | 0                      |                                                         | 0                                       | 0                             | 0                                            |
|                    | mVSD                 | 1       | 5       | 0           | 0      |                                   | 0                 | 1                 | 0                      |                                                         | 1                                       | 1                             | 0                                            |
|                    | muscVSD              | 0       | 11      | 0           | 0      |                                   | 3                 | 1                 | 1                      |                                                         | 4                                       | 3                             | 0                                            |
|                    | AVSD                 | 0       | 0       | 0           | 0      |                                   | 1                 | 0                 | 0                      |                                                         | 0                                       | 0                             | 0                                            |
| Multiple           | OFT + mVSD           | 0       | 1       | 0           | 2      |                                   | 0                 | 2                 | 0                      |                                                         | 1                                       | 0                             | 0                                            |
|                    | mVSD + muscVSD       | 0       | 4       | 0           | 0      |                                   | 0                 | 1                 | 0                      |                                                         | 2                                       | 1                             | 0                                            |
|                    | OFT + mVSD + muscVSD | 0       | 4       | 0           | 0      |                                   | 3†                | 2                 | 0                      |                                                         | 4                                       | 1                             | 1                                            |
|                    | mVSD + AVSD          | 0       | 0       | 0           | 0      |                                   | 0                 | 0                 | 0                      |                                                         | 0                                       | 0                             | 0                                            |
|                    | OFT + mVSD + AVSD    | 0       | 0       | 0           | 0      |                                   | 1                 | 1                 | 0                      |                                                         | 0                                       | 0                             | 0                                            |
|                    | muscVSD + AVSD       | 0       | 4       | 0           | 0      |                                   | 0                 | 0                 | 0                      |                                                         | 0                                       | 1                             | 0                                            |
|                    | OFT + muscVSD + AVSD | 0       | 1       | 0           | 1      |                                   | 8‡                | 2                 | 0                      |                                                         | 1                                       | 2                             | 0                                            |
| Total abnormal     |                      | 1       | 30      | 0           | 3      |                                   | 16                | 10                | 1                      |                                                         | 13                                      | 9                             | 1                                            |
| Total normal       |                      | 36      | 12      | 26          | 22     |                                   | 2                 | 9                 | 15                     |                                                         | 3                                       | 3                             | 18                                           |
| P value vs control |                      | -       | <0.0001 | 0.5873      | 0.1752 | P value vs <i>Dp1Tyb+</i> control | <0.0001           | 0.0037            | -                      | P value vs <i>Tbx1</i> <sup>+/<i>null</i></sup> control | <0.0001                                 | <0.0001                       | -                                            |

|               |  |   |   |         |         |                               |        |   |   |                                          |        |   |   |
|---------------|--|---|---|---------|---------|-------------------------------|--------|---|---|------------------------------------------|--------|---|---|
| P value vs ID |  | - | - | <0.0001 | <0.0001 | P value vs <i>Dp1Tyb</i> - ID | 0.0186 | - | - | P value vs <i>Tbx1</i> <sup>+/+</sup> ID | 0.5208 | - | - |
|---------------|--|---|---|---------|---------|-------------------------------|--------|---|---|------------------------------------------|--------|---|---|

731

732

733 **Extended Table 2. Summary of aortic arch morphology at E15.5**

| Types of defects   | control | ID     | E7.5 rescue | ID/VAD |                                   | <i>Dp1Tyb+</i> ID | <i>Dp1Tyb-</i> ID | <i>Dp1Tyb+</i> control |                                                  | <i>Tbx1<sup>+/-null</sup></i> ID | <i>Tbx1<sup>+/+</sup></i> ID | <i>Tbx1<sup>+/-null</sup></i> control |
|--------------------|---------|--------|-------------|--------|-----------------------------------|-------------------|-------------------|------------------------|--------------------------------------------------|----------------------------------|------------------------------|---------------------------------------|
| IAA                | 0       | 3      | 0           | 0      |                                   | 4                 | 1                 | 0                      |                                                  | 0                                | 0                            | 1                                     |
| A-RSA              | 0       | 1      | 1           | 1      |                                   | 1                 | 3                 | 0                      |                                                  | 4                                | 1                            | 4                                     |
| R-LCC              | 0       | 1      | 0           | 0      |                                   | 2                 | 0                 | 1                      |                                                  | 0                                | 0                            | 0                                     |
| right-sided AA     | 1       | 1      | 0           | 0      |                                   | 2                 | 0                 | 1                      |                                                  | 2                                | 0                            | 1                                     |
| abnormal           | 1       | 5      | 1           | 1      |                                   | 7                 | 4                 | 1                      |                                                  | 6                                | 1                            | 6                                     |
| normal             | 36      | 35     | 24          | 24     |                                   | 11                | 15                | 14                     |                                                  | 10                               | 11                           | 13                                    |
| P value vs control | -       | 0.1189 | 0.6478      | 0.6478 | P value vs <i>Dp1Tyb+</i> control | 0.0375            | 0.2507            | -                      | P value vs <i>Tbx1<sup>+/-null</sup></i> control | 0.4946                           | 0.1430                       | -                                     |
| P value vs ID      | -       | -      | 0.2456      | 0.2456 | P value vs <i>Dp1Tyb-</i> ID      | 0.2046            | -                 | -                      | P value vs <i>Tbx1<sup>+/+</sup></i> ID          | 0.0908                           | -                            | -                                     |

734

735 IAA, interrupted aortic arch; A-RSA, aberrant right subclavian artery; R-LCC, retroesophageal left subclavian artery.

736 Note that an embryo may have more than one phenotype.

## 737 **Methods**

### 738 **Animals**

739 All animal experiments were compliant with the UK Animals (Scientific Procedures) Act  
740 1986 and approved by the University of Oxford animal welfare review board and the Home  
741 Office (project license PB01E1FB3). Mice were housed in an SPF facility free from the  
742 major rodent pathogens except *Helicobacter hepaticus*, with a 12:12 hour light/dark cycle,  
743 at 19-23 °C, 55 ±10 % humidity, in individually-ventilated cages (Tecniplast UK Ltd,  
744 Rushden, UK) containing Grade 4 Aspen Chip bedding (Datesand Ltd, Manchester, UK),  
745 cardboard tunnels and Sizzle Pet nesting material (LBS Biotechnology, Horley, UK), with  
746 free access to food and tap water. Bedding was changed fortnightly, and animals were  
747 assessed daily for welfare. Mice were fed with Teklad 2916 or TD.08713 (control),  
748 TD.99397 (iron deficient) or TD.190023 (iron and vitamin A deficient), all from Envigo,  
749 Belton, UK. C57BL/6J mice were purchased from Charles River UK. Genetically-modified  
750 mouse strains were; *Tg(Mef2c-EGFP)#Krc* (Mef2c-AHF-GFP)<sup>32</sup>; *Tg(RARE-*  
751 *Hspa1b/lacZ)12Jrt* (RARE-LacZ)<sup>45</sup>; *Dp(16Lipi-Zbtb21)1TybEmcf (Dp1Tyb)*<sup>73</sup>; and  
752 *Tbx1<sup>tm1Bld</sup> (Tbx1<sup>LacZ</sup>)*<sup>72</sup>. All genetically-modified mice were from colonies that had been  
753 backcrossed for more than 10 generations onto the C57BL/6J background, with the  
754 exception of the RARE-LacZ strain, which was maintained on a CD-1 background.

### 755 **Blood haemoglobin and liver iron content measurement**

756 Blood haemoglobin levels were measured in fresh blood using a HemoCue<sup>®</sup> Hb 201<sup>+</sup>  
757 according to the manufacturer's instructions. Values of two separate samples were  
758 averaged. Two liver samples were taken per animal at sacrifice and one snap-frozen in  
759 liquid nitrogen, and the other fixed overnight in Formalin. Frozen samples were analysed  
760 by inductively coupled plasma mass spectrometry (ICP-MS) as previously described<sup>93</sup>.  
761 Fixed samples were paraffin embedded, sectioned, and stained by the DAB-enhanced  
762 Perls method as previously described<sup>93</sup>. Slides were imaged with a Nikon COOLSCOPE  
763 slide scanner and staining intensity was measured by colour deconvolution with the H DAB  
764 vector in FIJI 2.0.0-rc-69/1.52p software.

### 765 **Embryo and heart morphology assessment**

766 Micromagnetic resonance imaging ( $\mu$ MRI) was performed as previously described<sup>94,95</sup>,  
767 using either a Varian 9.4 T VNMRs 20 cm horizontal-bore system (Varian Inc. Palo Alto,  
768 CA, USA) or a 11.7 T (500 MHz) vertical magnet (MagneX Scientific, Oxon, UK), both  
769 running a Varian/Agilent DDR2 console. Fixed embryos were incubated in 2 mM  
770 Magnevist<sup>®</sup> (Bayer) and embedded in agarose in a Wilmad LabGlass 28-PP-9" tube.  
771 Parameters for the 9.4T system were: TR 28 ms, TE 16ms, flip angle 52°, 5 averages,  
772 27x27x27mm<sup>3</sup> with a matrix size of 512<sup>3</sup>, giving an isotropic resolution of 52x52x52  $\mu$ m<sup>3</sup>  
773 per voxel. A hard RF pulse (duration 100ms) was used for excitation and receiver  
774 bandwidth of 66 kHz. Parameters for the 11.7T system were: TR 16.8 ms; TE 4.5 ms; 50°  
775 flip angle (BIR-4 adiabatic); 9 averages, 24x24x32 mm<sup>3</sup> FOV; 1024x1024x1366 matrix  
776 size, 50 kHz bandwidth, 75% partial fourier scheme<sup>96</sup>; and reconstructed with the Berkley  
777 advanced reconstruction toolkit (<https://mrrecon.github.io/bart/>) as 1536x1536x2049  
778 (complex double) voxels with an isotropic 15.6  $\mu$ m<sup>3</sup> resolution. In all cases,  $\mu$ MRI was  
779 followed by paraffin embedding, sectioning and H&E staining. High resolution episodic  
780 microscopy (HREM) was performed as previously described<sup>97</sup> using an JB-4 embedding  
781 kit (00226-1, Polysciences GMBH, Germany).  $\mu$ MRI and HREM data were analysed using  
782 OsiriX MD DICOM viewer version 9.0.2 (Pixmeo), Horos 3.3.6 (<https://horosproject.org>)  
783 and Amira for Life & Biomedical Sciences version 2019.4 (Thermo Fisher Scientific).

### 784 **RNA-Seq**

785 1,110-4,566 GFP-expressing viable cells were sorted from E9.5 embryos carrying the  
786 Mef2c-AHF-GFP allele<sup>30</sup> by FACS using a Beckman Coulter MoFlo AstriosEQ with Summit  
787 6.2.7.16492 software. GFP was detected with the 488nm laser and a 513/26 band pass

788 filter, and DAPI as a viability dye was detected with the 405nm laser and a 448/59 band  
789 pass filter. Cells were collected into Eppendorf DNA LoBind tubes containing lysis buffer,  
790 and RNA isolated using a Qiagen RNeasy Mini kit. RNA quality was assessed using RNA  
791 pico chips on an Agilent 2100 Bioanalyzer. Library preparation (SMARTer Ultra Low Input  
792 RNA for Illumina Sequencing - HV kit) and sequencing (Illumina HiSeq4000) were  
793 performed by the High-Throughput Genomics Group at the Wellcome Trust Centre for  
794 Human Genetics. The samples were processed sequenced in two batches. Batch 1  
795 contained three control and five hypoxia samples, and batch 2 contained two repeated  
796 control samples with five ID samples.

### 797 **RNA-Seq data analysis**

798 QC of the raw sequencing reads was performed using FastQC  
799 (<https://www.bioinformatics.babraham.ac.uk/projects/fastqc>). Reads were aligned to Mus  
800 musculus genome (mm10) using the splice-aware algorithm STAR v2.5.3a<sup>98</sup>. Gencode  
801 version M12 (Ensembl 87) was used for the annotation of the mouse genome. The DNA  
802 sequence of the GFP vector was included in the mm10 reference and its transcript was  
803 taken into account during alignment. The R Package Rsubread<sup>99</sup> was used to assign and  
804 quantify the reads corresponding to each genomic feature indicated by the mm10  
805 Gencode transcripts. Reads were assigned to the target that has the largest number of  
806 overlapping bases. The minimum fraction of overlapping bases in a read that is required  
807 for read assignment was 0.25. Counts per million (CPM) values were calculated for each  
808 sample and genes were excluded from the analysis if they did not have a CPM of a least  
809 0.5 in a least 2 libraries. Normalisation was performed using trimmed mean of values  
810 (TMM) as implemented in the edgeR R package<sup>100</sup> to scale the raw library sizes<sup>101</sup>. Voom  
811 transformation was performed to prepare the data for linear modelling using limma<sup>102,103</sup>.  
812 Principal Component Analysis and Multidimensional scaling was performed for quality  
813 control to investigate sample clustering. Batch correction was performed using the ComBat  
814 method<sup>104</sup> and the sva R package<sup>105</sup>. Differential expression analysis between control and  
815 treated samples was performed using limma<sup>103</sup>. Multiple testing correction was performed  
816 on the p-values using the Benjamini-Hochberg false-discovery rate (FDR) procedure with  
817 an FDR <5%<sup>106</sup>. Differentially expressed genes were determined using adjusted p-value  
818 <0.01 and logFC >1 or <-1 and B >1. Unsupervised Hierarchical clustering (Extended  
819 Figure 3b) was performed using the Euclidian distance measure and complete  
820 agglomeration method and the pheatmap R package ([https://cran.r-](https://cran.r-project.org/web/packages/pheatmap/index.html)  
821 [project.org/web/packages/pheatmap/index.html](https://cran.r-project.org/web/packages/pheatmap/index.html)).

### 822 **Immunohistochemistry and X-gal staining**

823 Immunohistochemistry on paraffin sections was done as previously described<sup>5</sup>. Briefly,  
824 embryos were fixed overnight in 4% paraformaldehyde at 4°C, paraffin embedded and  
825 sectioned in the indicated plane. To minimise inter-slide staining variation, tissue arrays  
826 were made by putting single sections from 12-20 different embryos on a single slide, and  
827 slides were processed using a Shandon Sequenza® Immunostaining Center (Thermo  
828 Fisher Scientific). For immunohistochemistry on wholemount hearts, tissue was fixed  
829 overnight in paraformaldehyde at 4°C. Hearts were washed three times in phosphate  
830 buffered saline plus 0.1% Triton X-100 (PBST), blocked in 5% goat serum in PBST for one  
831 hour at 4°C, then incubated in Armenian hamster anti-CD31 monoclonal antibody in PBST  
832 plus 1% bovine serum albumin overnight at 4°C. Hearts were washed three times in  
833 PBST, then incubated in biotinylated goat anti-Armenian hamster secondary antibody for  
834 60 minutes at 4°C. Hearts were washed three times in PBST, then incubated in avidin-  
835 biotin horseradish peroxidase complex (ABC Elite, Vector PK-4000) 1:50 in PBS for 30  
836 minutes. Finally, hearts were washed three times in PBST and placed in DAB substrate  
837 (Vector peroxidase substrate kit, SK-4100). When staining was complete, the reaction was

838 stopped by washing in MilliQ water. X-gal staining of embryos in wholemount was done as  
 839 previously described<sup>107</sup>.

840 **Antibodies**

| Target                                    | Name       | Catalog number | Species and type            | Supplier                                            | Dilution |
|-------------------------------------------|------------|----------------|-----------------------------|-----------------------------------------------------|----------|
| <b>Primary antibodies</b>                 |            |                |                             |                                                     |          |
| MYOSIN II HEAVY CHAIN                     | MF 20      |                | mouse monoclonal            | Developmental Studies Hybridoma Bank <sup>108</sup> | 1:100    |
| phospho-HISTONE H3                        | (Ser 10)-R | sc-8656        | rabbit polyclonal           | Santa Cruz Biotechnology                            | 1:200    |
| GATA4                                     |            | sc-25310       | mouse monoclonal            | Santa Cruz Biotechnology                            | 1:100    |
| TBX5                                      |            | sc-515536      | mouse polyclonal            | Santa Cruz Biotechnology                            | 1:500    |
| NKX2-5                                    | N-19       | sc-8697        | goat polyclonal             | Santa Cruz Biotechnology                            | 1:250    |
| CD31 (heart)                              |            | ab119341       | Armenian hamster monoclonal | Abcam                                               | 1:500    |
| CD31 (back skin)                          |            | 553370         | rat monoclonal              | BD Pharmingen                                       | 1:500    |
| PROX1                                     |            | AF2727         | goat polyclonal             | R&D systems                                         | 1:500    |
| NRP2                                      | D39A5      | 3366           | rabbit monoclonal           | Cell Signaling Technology                           | 1:500    |
| <b>Secondary antibodies</b>               |            |                |                             |                                                     |          |
| Donkey anti-mouse Cy <sup>TM</sup> 3      |            | 718-064-151    |                             | Jackson ImmunoResearch                              | 1:500    |
| Donkey anti-mouse AlexaFluor® 488         |            | 715-545-151    |                             | Jackson ImmunoResearch                              | 1:500    |
| Donkey anti-rabbit Cy <sup>TM</sup> 3     |            | 711-165-152    |                             | Jackson ImmunoResearch                              | 1:500    |
| Donkey anti-rabbit AlexaFluor® 488        |            | 711-545-152    |                             | Jackson ImmunoResearch                              | 1:500    |
| Donkey anti-goat AlexaFluor® 488          |            | A-11055        |                             | Life Technologies                                   | 1:500    |
| Donkey anti-rat Dylight <sup>TM</sup> 405 |            | 712-475-153    |                             | Jackson ImmunoResearch                              | 1:500    |
| Goat anti-Armenian hamster Biotinylated   |            | ab5744         |                             | Abcam                                               | 1:250    |
| <b>Nuclear stain</b>                      |            |                |                             |                                                     |          |
| TO-PRO®-3 Iodide                          |            | T3605          |                             | Life Technologies                                   | 1:10,000 |

841 **Statistical analyses**

842 All statistical analyses were performed with Prism 8.4.2 (GraphPad Software). Data were  
 843 first tested for normal distribution by Shapiro-Wilk test and equal variance by F test. For  
 844 data with two groups, normally distributed samples were tested for statistical significance  
 845 using two-tailed Student's t test (if variances equal) or two-tailed Welch's corrected t test (if

846 unequal variances). Non-normally distributed samples were tested using a two-tailed  
847 Mann-Whitney U test. For data with more than two groups, normally distributed data were  
848 tested using ANOVA followed by Tukey's post-hoc test to compare the means of each  
849 group with every other group. Non-normally distributed data were tested using Kruskal–  
850 Wallis one-way ANOVA with Dunnett's post-hoc test. The statistical significance of  
851 binomial prevalence data was tested using one-tailed Fisher's exact test. Data are  
852 presented as mean  $\pm$  standard deviation, except for Extended Figure 1 panel i, which  
853 shows median  $\pm$  95% confidence interval.

#### 854 **Equipment and settings**

855 Figure 1. Panels a,b: images were taken at 0.75x magnification on a Leica M80 dissecting  
856 microscope with a Plan 1.0x M-series objective, 0.8x video adapter, a Leica DMC4500  
857 camera and Leica LAS software. Images were captured at 1920x2560 pixel resolution in 8  
858 bit RGB. Adobe Photoshop was used to adjust the highlight levels to 120 equally for both  
859 images, and the Auto Color function was used on the image in panel b. Panels d-g:  
860 images were taken at 6x magnification on a Leica M80 dissecting microscope with a Plan  
861 1.0x M-series objective, 0.8x video adapter, a Leica DMC4500 camera and Leica LAS  
862 software. Images were captured at 1920x2560 pixel resolution in 8 bit RGB. Highlight  
863 levels were adjusted to 140, and lowlight levels to 50, equally on all images in Adobe  
864 Photoshop.

865 Figure 3. Panels a,b,a',b',f,g,f',g': images were taken on an Olympus FV1000 confocal  
866 microscope using an Olympus UPLSAPO NA 0.75 20x objective and Fluoview FV31S-SW.  
867 Images were captured at 1024x1024 pixel resolution in 16 bit grayscale. Panels j,k:  
868 images were taken at 14x magnification on a Leica DM6000B microscope with a 20x HCX  
869 PL FLUOTAR NA 0.5 objective, a 0.7x phototube, a Leica DFC550 camera and Leica LAS  
870 software. Images were captured at 2720x2048 pixel resolution in 16 bit RGB, and cropped  
871 to 2048x2048 pixels.

872 Figure 4. Panels a,b: 5 image Z-stacks of tiled images (7x3 for panel 1 and 6x3 for panel  
873 b) were taken on an Olympus FV3000 confocal microscope using an Olympus UPLSAPO  
874 NA 0.4 10x objective, stitched automatically using Fluoview FV31S-SW software, and  
875 converted to a maximum intensity projection. Individual images were captured at  
876 1024x1024 pixel resolution in 16 bit grayscale. The total size of the tiled images was 6862  
877 x 2970 (panel a) and 5889x2970 (panel b) pixels. The image in panel a was cropped to  
878 5889x2970 pixels. For the CD31 layers, highlight levels were adjusted to 150, and lowlight  
879 levels to 20, equally for both images in Adobe Photoshop. Panels a'-b''': images from  
880 panels a,b were cropped to 1000x1000 pixels. Panels e-h: images were taken at 1.75x  
881 (panels e,g) or 14x (panels f,h) magnification on a Leica DM6000B microscope with a 2.5x  
882 PL FLUOTAR NA 0.07 or a 20x HCX PL FLUOTAR NA 0.5 objective, a 0.7x phototube, a  
883 Leica DMC550 camera and Leica LAS software. Images were captured at 2720x2048  
884 pixel resolution in 16 bit RGB. For panels e,g highlight levels were adjusted to 225, and  
885 lowlight levels to 90, equally on both images; for panels f,h highlight levels were adjusted  
886 to 225, and lowlight levels to 110, equally on all images in Adobe Photoshop. Panels i-l:  
887 images were taken at 2.5x magnification on a Leica M80 dissecting microscope with a  
888 Plan 1.0x M-series objective, 0.8x video adapter, a Leica DMC4500 camera and Leica  
889 LAS software. Images were captured at 1920x2560 pixel resolution in 8 bit RGB, and  
890 cropped to 1920x1920 pixels. Panels m,o: 10 image Z-stacks were taken on an Olympus  
891 FV3000 confocal microscope using an Olympus UPLSAPO NA 0.16 4x objective and  
892 Fluoview FV31S-SW. Images were captured at 1024x1024 pixel resolution in 16 bit  
893 grayscale. Highlight brightness was adjusted using FIJI software equally in both images.  
894 Panels n,p: 10 image Z-stacks were taken on an Olympus FV3000 confocal microscope  
895 using an Olympus UPLSAPO NA 0.95 40x objective and Fluoview FV31S-SW. Images

896 were captured at 1024x1024 pixel resolution in 16 bit grayscale. . Highlight brightness was  
897 adjusted using FIJI software equally in both images.

898 Figure 5. Panels c-f: images were taken at 0.75x magnification on a Leica M80 dissecting  
899 microscope with a Plan 1.0x M-series objective, 0.8x video adapter, a Leica DMC4500  
900 camera and Leica LAS software. Images were captured at 1920x2560 pixel resolution in 8  
901 bit RGB.

902 Extended Figure 1. Panels c,d: images were taken at 20x magnification using a Nikon  
903 Coolscope microscope slide scanner at 1280x960 pixel resolution in 8 bit RGB, and  
904 cropped to 960x960 pixels.

905 Extended Figure 3. Panel a: image was captured at 8x magnification using a Zeiss  
906 Discovery V8 microscope with PentaFluar S, a Achromat S 1.0x objective, 60N-C 1" 1.0x  
907 adapter, Axiocam 506m camera and Zeiss Zen software. The image was captured at  
908 2752x2208 pixel resolution in 16 bit grayscale. The image was cropped to 1756x1498  
909 pixels, highlight levels adjusted to 70 and lowlight levels adjusted to 10 using Adobe  
910 Photoshop.

911 Extended Figure 4. Panels a,b,e,f: images were taken on an Olympus FV1000 confocal  
912 microscope using an Olympus UPLSAPO NA 0.75 20x objective and Fluoview FV31S-SW.  
913 Images were captured at 1024x1024 pixel resolution in 16 bit grayscale. For panels e and  
914 f, highlight levels were adjusted to 140, and lowlight levels to 20, equally on both images in  
915 Adobe Photoshop. Panels h,i: images were taken at 1.25x magnification on a Leica M80  
916 dissecting microscope with a Plan 1.0x M-series objective, 0.8x video adapter, a Leica  
917 DMC4500 camera and Leica LAS software. Images were captured at 1920x2560 pixel  
918 resolution in 8 bit RGB, cropped to 800x1500 pixels and brightness adjusted to +60  
919 equally in both images in Adobe Photoshop.

## 920 **Data availability**

921 The RNA-Seq data supporting the findings of this study have been deposited in the  
922 Sequence Read Archive (SRA) with BioProject ID PRJNA596545. Other data that support  
923 the findings of this study are available from the corresponding author upon reasonable  
924 request.

## 925 **References**

- 926 1 Liu, Y. *et al.* Global birth prevalence of congenital heart defects 1970-2017: updated  
927 systematic review and meta-analysis of 260 studies. *Int J Epidemiol*,  
928 doi:10.1093/ije/dyz009 (2019).
- 929 2 Alankarage, D. *et al.* Identification of clinically actionable variants from genome  
930 sequencing of families with congenital heart disease. *Genet Med* **21**, 1111-1120,  
931 doi:10.1038/s41436-018-0296-x (2018).
- 932 3 Kalisch-Smith, J. I., Ved, N. & Sparrow, D. B. in *Heart Development and Disease*  
933 (eds B. G. Bruneau & P. R. Riley) (Cold Spring Harbor Laboratory Press, in press).
- 934 4 World Health Organization. The global prevalence of anaemia in 2011. (2015).
- 935 5 Shi, H. *et al.* Gestational stress induces the unfolded protein response, resulting in  
936 heart defects. *Development* **143**, 2561-2572, doi:10.1242/dev.136820 (2016).
- 937 6 Yuan, X. *et al.* Disruption of spatiotemporal hypoxic signaling causes congenital  
938 heart disease in mice. *J Clin Invest* **127**, 2235-2248, doi:10.1172/JCI88725 (2017).
- 939 7 Clark, R. L. *et al.* Diflunisal-induced maternal anemia as a cause of teratogenicity in  
940 rabbits. *Teratology* **30**, 319-332, doi:10.1002/tera.1420300304 (1984).
- 941 8 Shepard, T. H., Mackler, B. & Finch, C. A. Reproductive studies in the iron-deficient  
942 rat. *Teratology* **22**, 329-334, doi:10.1002/tera.1420220310 (1980).



- 943 9 Yang, J. *et al.* Maternal iron intake during pregnancy and birth outcomes: a cross-  
944 sectional study in Northwest China. *Br J Nutr* **117**, 862-871,  
945 doi:10.1017/S0007114517000691 (2017).
- 946 10 Yang, J. *et al.* Iron intake and iron status during pregnancy and risk of congenital  
947 heart defects: A case-control study. *Int J Cardiol* **301**, 74-79,  
948 doi:10.1016/j.ijcard.2019.11.115 (2020).
- 949 11 Chung, Y. J. *et al.* Iron-deficiency anemia reduces cardiac contraction by  
950 downregulating RyR2 channels and suppressing SERCA pump activity. *JCI Insight* **4**,  
951 doi:10.1172/jci.insight.125618 (2019).
- 952 12 Francou, A., Saint-Michel, E., Mesbah, K. & Kelly, R. G. TBX1 regulates epithelial  
953 polarity and dynamic basal filopodia in the second heart field. *Development* **141**, 4320-  
954 4331, doi:10.1242/dev.115022 (2014).
- 955 13 Rochais, F. *et al.* Hes1 is expressed in the second heart field and is required for  
956 outflow tract development. *PLoS One* **4**, e6267, doi:10.1371/journal.pone.0006267  
957 (2009).
- 958 14 Roux, M., Laforest, B., Capecchi, M., Bertrand, N. & Zaffran, S. Hoxb1 regulates  
959 proliferation and differentiation of second heart field progenitors in pharyngeal  
960 mesoderm and genetically interacts with Hoxa1 during cardiac outflow tract  
961 development. *Dev Biol* **406**, 247-258, doi:10.1016/j.ydbio.2015.08.015 (2015).
- 962 15 MacGrogan, D. *et al.* How to make a heart valve: from embryonic development to  
963 bioengineering of living valve substitutes. *Cold Spring Harb Perspect Med* **4**, a013912,  
964 doi:10.1101/cshperspect.a013912 (2014).
- 965 16 Anderson, R. H., Mori, S., Spicer, D. E., Brown, N. A. & Mohun, T. J. Development  
966 and Morphology of the Ventricular Outflow Tracts. *World J Pediatr Congenit Heart Surg*  
967 **7**, 561-577, doi:10.1177/2150135116651114 (2016).
- 968 17 Anderson, R. H., Spicer, D. E., Mohun, T. J., Hikspoors, J. & Lamers, W. H.  
969 Remodeling of the Embryonic Interventricular Communication in Regard to the  
970 Description and Classification of Ventricular Septal Defects. *Anat Rec (Hoboken)* **302**,  
971 19-31, doi:10.1002/ar.24020 (2019).
- 972 18 Anderson, R. H., Brown, N. A. & Mohun, T. J. Insights regarding the normal and  
973 abnormal formation of the atrial and ventricular septal structures. *Clin Anat* **29**, 290-304,  
974 doi:10.1002/ca.22627 (2016).
- 975 19 Gupta, S. K., Bamforth, S. D. & Anderson, R. H. How frequent is the fifth arch  
976 artery? *Cardiol Young* **25**, 628-646, doi:10.1017/S1047951114002182 (2015).
- 977 20 Lindsay, E. A. & Baldini, A. Recovery from arterial growth delay reduces penetrance  
978 of cardiovascular defects in mice deleted for the DiGeorge syndrome region. *Hum Mol*  
979 *Genet* **10**, 997-1002, doi:10.1093/hmg/10.9.997 (2001).
- 980 21 Phillips, H. M. *et al.* Pax9 is required for cardiovascular development and interacts  
981 with Tbx1 in the pharyngeal endoderm to control 4th pharyngeal arch artery  
982 morphogenesis. *Development* **146**, doi:UNSP dev177618, doi:10.1242/dev.177618  
983 (2019).
- 984 22 Priya, S., Thomas, R., Nagpal, P., Sharma, A. & Steigner, M. Congenital anomalies  
985 of the aortic arch. *Cardiovasc Diagn Ther* **8**, S26-S44, doi:10.21037/cdt.2017.10.15  
986 (2018).
- 987 23 Eley, L. *et al.* A novel source of arterial valve cells linked to bicuspid aortic valve  
988 without raphe in mice. *Elife* **7**, doi:10.7554/eLife.34110 (2018).
- 989 24 Mifflin, J. J., Dupuis, L. E., Alcalá, N. E., Russell, L. G. & Kern, C. B. Intercalated  
990 cushion cells within the cardiac outflow tract are derived from the myocardial troponin T  
991 type 2 (Tnnt2) Cre lineage. *Dev Dyn* **247**, 1005-1017, doi:10.1002/dvdy.24641 (2018).
- 992 25 Peterson, J. C. *et al.* Bicuspid aortic valve formation: Nos3 mutation leads to  
993 abnormal lineage patterning of neural crest cells and the second heart field. *Dis Model*  
994 *Mech* **11**, doi:10.1242/dmm.034637 (2018).

- 995 26 Liao, J. *et al.* Identification of downstream genetic pathways of Tbx1 in the second  
996 heart field. *Dev Biol* **316**, 524-537, doi:10.1016/j.ydbio.2008.01.037 (2008).
- 997 27 Park, E. J. *et al.* An FGF autocrine loop initiated in second heart field mesoderm  
998 regulates morphogenesis at the arterial pole of the heart. *Development* **135**, 3599-3610,  
999 doi:10.1242/dev.025437 (2008).
- 1000 28 Zhang, J. *et al.* Frs2alpha-deficiency in cardiac progenitors disrupts a subset of  
1001 FGF signals required for outflow tract morphogenesis. *Development* **135**, 3611-3622,  
1002 doi:10.1242/dev.025361 (2008).
- 1003 29 Ramsbottom, S. A. *et al.* Vangl2-regulated polarisation of second heart field-derived  
1004 cells is required for outflow tract lengthening during cardiac development. *PLoS Genet*  
1005 **10**, e1004871, doi:10.1371/journal.pgen.1004871 (2014).
- 1006 30 Qyang, Y. *et al.* The renewal and differentiation of Isl1+ cardiovascular progenitors  
1007 are controlled by a Wnt/beta-catenin pathway. *Cell Stem Cell* **1**, 165-179,  
1008 doi:10.1016/j.stem.2007.05.018 (2007).
- 1009 31 Mootha, V. K. *et al.* PGC-1alpha-responsive genes involved in oxidative  
1010 phosphorylation are coordinately downregulated in human diabetes. *Nat Genet* **34**, 267-  
1011 273, doi:10.1038/ng1180 (2003).
- 1012 32 Subramanian, A. *et al.* Gene set enrichment analysis: a knowledge-based approach  
1013 for interpreting genome-wide expression profiles. *Proc Natl Acad Sci U S A* **102**, 15545-  
1014 15550, doi:10.1073/pnas.0506580102 (2005).
- 1015 33 de Soysa, T. Y. *et al.* Single-cell analysis of cardiogenesis reveals basis for organ-  
1016 level developmental defects. *Nature* **572**, 120-124, doi:10.1038/s41586-019-1414-x  
1017 (2019).
- 1018 34 Chen, L., Fulcoli, F. G., Tang, S. & Baldini, A. Tbx1 regulates proliferation and  
1019 differentiation of multipotent heart progenitors. *Circ Res* **105**, 842-851,  
1020 doi:10.1161/CIRCRESAHA.109.200295 (2009).
- 1021 35 Ilagan, R. *et al.* Fgf8 is required for anterior heart field development. *Development*  
1022 **133**, 2435-2445, doi:10.1242/dev.02408 (2006).
- 1023 36 Xu, H. *et al.* Tbx1 has a dual role in the morphogenesis of the cardiac outflow tract.  
1024 *Development* **131**, 3217-3227, doi:10.1242/dev.01174 (2004).
- 1025 37 Nemer, G. & Nemer, M. in *Heart Development and Regeneration* Vol. 1 (eds N.  
1026 Rosenthal & R.P. Harvey) Ch. 9.2, 599-616 (Academic Press, 2010).
- 1027 38 Billings, S. E. *et al.* The retinaldehyde reductase DHRS3 is essential for preventing  
1028 the formation of excess retinoic acid during embryonic development. *FASEB J* **27**,  
1029 4877-4889, doi:10.1096/fj.13-227967 (2013).
- 1030 39 Bowles, J. *et al.* Control of retinoid levels by CYP26B1 is important for lymphatic  
1031 vascular development in the mouse embryo. *Developmental Biology* **386**, 25-33,  
1032 doi:10.1016/j.ydbio.2013.12.008 (2014).
- 1033 40 Roberts, C., Ivins, S., Cook, A. C., Baldini, A. & Scambler, P. J. Cyp26 genes a1, b1  
1034 and c1 are down-regulated in Tbx1 null mice and inhibition of Cyp26 enzyme function  
1035 produces a phenocopy of DiGeorge Syndrome in the chick. *Hum Mol Genet* **15**, 3394-  
1036 3410, doi:10.1093/hmg/ddl416 (2006).
- 1037 41 Cohlant, S. Q. Excessive intake of vitamin A as a cause of congenital anomalies in  
1038 the rat. *Science* **117**, 535-536, doi:10.1126/science.117.3046.535 (1953).
- 1039 42 Lammer, E. J. *et al.* Retinoic Acid Embryopathy. *New Engl J Med* **313**, 837-841,  
1040 doi:Doi 10.1056/Nejm198510033131401 (1985).
- 1041 43 Arceci, R. J., King, A. A., Simon, M. C., Orkin, S. H. & Wilson, D. B. Mouse GATA-  
1042 4: a retinoic acid-inducible GATA-binding transcription factor expressed in endodermally  
1043 derived tissues and heart. *Mol Cell Biol* **13**, 2235-2246, doi:10.1128/mcb.13.4.2235  
1044 (1993).

- 1045 44 Ghatpande, S., Ghatpande, A., Zile, M. & Evans, T. Anterior endoderm is sufficient  
1046 to rescue foregut apoptosis and heart tube morphogenesis in an embryo lacking retinoic  
1047 acid. *Dev Biol* **219**, 59-70, doi:10.1006/dbio.1999.9601 (2000).
- 1048 45 Rossant, J., Zirngibl, R., Cado, D., Shago, M. & Giguere, V. Expression of a  
1049 Retinoic Acid Response Element-HsplacZ Transgene Defines Specific Domains of  
1050 Transcriptional Activity during Mouse Embryogenesis. *Gene Dev* **5**, 1333-1344, doi:DOI  
1051 10.1101/gad.5.8.1333 (1991).
- 1052 46 Ghyselinck, N. B. & Duyster, G. Retinoic acid signaling pathways. *Development*  
1053 **146**, doi:10.1242/dev.167502 (2019).
- 1054 47 Wilson, R. *et al.* Highly variable penetrance of abnormal phenotypes in embryonic  
1055 lethal knockout mice. *Wellcome Open Res* **1**, 1, doi:10.12688/wellcomeopenres.9899.2  
1056 (2016).
- 1057 48 Bellini, C. *et al.* Etiology of non-immune hydrops fetalis: An update. *Am J Med*  
1058 *Genet A* **167A**, 1082-1088, doi:10.1002/ajmg.a.36988 (2015).
- 1059 49 Betterman, K. L. & Harvey, N. L. Histological and Morphological Characterization of  
1060 Developing Dermal Lymphatic Vessels. *Methods Mol Biol* **1846**, 19-35,  
1061 doi:10.1007/978-1-4939-8712-2\_2 (2018).
- 1062 50 Qu, X., Tompkins, K., Batts, L. E., Puri, M. & Baldwin, H. S. Abnormal embryonic  
1063 lymphatic vessel development in Tie1 hypomorphic mice. *Development* **137**, 1285-  
1064 1295, doi:10.1242/dev.043380 (2010).
- 1065 51 Sharma, B., Chang, A. & Red-Horse, K. Coronary Artery Development: Progenitor  
1066 Cells and Differentiation Pathways. *Annu Rev Physiol* **79**, 1-19, doi:10.1146/annurev-  
1067 physiol-022516-033953 (2017).
- 1068 52 Chen, H. I. *et al.* The sinus venosus contributes to coronary vasculature through  
1069 VEGFC-stimulated angiogenesis. *Development* **141**, 4500-4512,  
1070 doi:10.1242/dev.113639 (2014).
- 1071 53 Tian, X. Y., Pu, W. T. & Zhou, B. Cellular Origin and Developmental Program of  
1072 Coronary Angiogenesis. *Circulation Research* **116**, 515-530,  
1073 doi:10.1161/Circresaha.116.305097 (2015).
- 1074 54 Wessels, A. *et al.* Epicardially derived fibroblasts preferentially contribute to the  
1075 parietal leaflets of the atrioventricular valves in the murine heart. *Dev Biol* **366**, 111-124,  
1076 doi:10.1016/j.ydbio.2012.04.020 (2012).
- 1077 55 Smart, N. *et al.* Thymosin beta4 induces adult epicardial progenitor mobilization and  
1078 neovascularization. *Nature* **445**, 177-182, doi:10.1038/nature05383 (2007).
- 1079 56 Wang, S. *et al.* Alterations in retinoic acid signaling affect the development of the  
1080 mouse coronary vasculature. *Dev Dyn* **247**, 976-991, doi:10.1002/dvdy.24639 (2018).
- 1081 57 Fernandez, B. *et al.* The coronary arteries of the C57BL/6 mouse strains:  
1082 implications for comparison with mutant models. *J Anat* **212**, 12-18, doi:10.1111/j.1469-  
1083 7580.2007.00838.x (2008).
- 1084 58 Wheby, M. S. & Crosby, W. H. The Gastrointestinal Tract and Iron Absorption.  
1085 *Blood* **22**, 416-428 (1963).
- 1086 59 Santos, M. *et al.* In vivo mucosal uptake, mucosal transfer and retention of iron in  
1087 mice. *Lab Anim* **31**, 264-270, doi:10.1258/002367797780596329 (1997).
- 1088 60 Sangkhae, V. *et al.* Effects of maternal iron status on placental and fetal iron  
1089 homeostasis. *J Clin Invest*, doi:10.1172/JCI127341 (2019).
- 1090 61 Sakabe, M., Kokubo, H., Nakajima, Y. & Saga, Y. Ectopic retinoic acid signaling  
1091 affects outflow tract cushion development through suppression of the myocardial Tbx2-  
1092 Tgfbeta2 pathway. *Development* **139**, 385-395, doi:10.1242/dev.067058 (2012).
- 1093 62 Yasui, H., Morishima, M., Nakazawa, M., Ando, M. & Aikawa, E. Developmental  
1094 spectrum of cardiac outflow tract anomalies encompassing transposition of the great  
1095 arteries and dextroposition of the aorta: pathogenic effect of extrinsic retinoic acid in the

- 1096 mouse embryo. *Anat Rec* **254**, 253-260, doi:10.1002/(SICI)1097-  
1097 0185(19990201)254:2<253::AID-AR11>3.0.CO;2-4 (1999).
- 1098 63 Yasui, H., Nakazawa, M., Morishima, M., Miyagawa-Tomita, S. & Momma, K.  
1099 Morphological observations on the pathogenetic process of transposition of the great  
1100 arteries induced by retinoic acid in mice. *Circulation* **91**, 2478-2486,  
1101 doi:10.1161/01.cir.91.9.2478 (1995).
- 1102 64 Niderla-Bielińska, J. *et al.* Proepicardium: Current Understanding of its Structure,  
1103 Induction, and Fate. *Anat Rec (Hoboken)* **302**, 893-903, doi:10.1002/ar.24028 (2019).
- 1104 65 Bautch, V. L. & Caron, K. M. Blood and lymphatic vessel formation. *Cold Spring*  
1105 *Harb Perspect Biol* **7**, a008268, doi:10.1101/cshperspect.a008268 (2015).
- 1106 66 Mason, K. E. Foetal death, prolonged gestation, and difficult parturition in the rat as  
1107 a result of Vitamin A-deficiency. *Am J Anat* **57**, 303-349 (1935).
- 1108 67 Prendiville, T., Jay, P. Y. & Pu, W. T. Insights into the genetic structure of  
1109 congenital heart disease from human and murine studies on monogenic disorders. *Cold*  
1110 *Spring Harb Perspect Med* **4**, doi:10.1101/cshperspect.a013946 (2014).
- 1111 68 Chapman, G. *et al.* Functional genomics and gene-environment interaction highlight  
1112 the complexity of Congenital Heart Disease caused by Notch pathway variants. *Hum*  
1113 *Mol Genet*, doi:10.1093/hmg/ddz270 (2019).
- 1114 69 Moreau, J. L. M. *et al.* Gene-environment interaction impacts on heart development  
1115 and embryo survival. *Development* **146**, doi:10.1242/dev.172957 (2019).
- 1116 70 Morrow, B. E., McDonald-McGinn, D. M., Emanuel, B. S., Vermeesch, J. R. &  
1117 Scambler, P. J. Molecular genetics of 22q11.2 deletion syndrome. *Am J Med Genet A*  
1118 **176**, 2070-2081, doi:10.1002/ajmg.a.40504 (2018).
- 1119 71 Hartman, R. J. *et al.* The contribution of chromosomal abnormalities to congenital  
1120 heart defects: a population-based study. *Pediatr Cardiol* **32**, 1147-1157,  
1121 doi:10.1007/s00246-011-0034-5 (2011).
- 1122 72 Lindsay, E. A. *et al.* Tbx1 haploinsufficiency in the DiGeorge syndrome region  
1123 causes aortic arch defects in mice. *Nature* **410**, 97-101, doi:10.1038/35065105 (2001).
- 1124 73 Lana-Elola, E. *et al.* Genetic dissection of Down syndrome-associated congenital  
1125 heart defects using a new mouse mapping panel. *Elife* **5**, doi:10.7554/eLife.11614  
1126 (2016).
- 1127 74 Chou, H. H. *et al.* Association of maternal chronic disease with risk of congenital  
1128 heart disease in offspring. *CMAJ* **188**, E438-E446, doi:10.1503/cmaj.160061 (2016).
- 1129 75 Liu, S. *et al.* Association between maternal chronic conditions and congenital heart  
1130 defects: a population-based cohort study. *Circulation* **128**, 583-589,  
1131 doi:10.1161/CIRCULATIONAHA.112.001054 (2013).
- 1132 76 Robinson, R. *et al.* Risk factors for congenital heart defects in two populations  
1133 residing in the same geographic area: a long-term population-based study, Southern  
1134 Israel. *Cardiol Young*, 1-5, doi:10.1017/S1047951119001409 (2019).
- 1135 77 Kolodzinska, A., Heleniak, A. & Ratajska, A. Retinoic acid-induced ventricular non-  
1136 compacted cardiomyopathy in mice. *Kardiol Pol* **71**, 447-452,  
1137 doi:10.5603/KP.2013.0090 (2013).
- 1138 78 Andreini, C., Putignano, V., Rosato, A. & Banci, L. The human iron-proteome.  
1139 *Metallomics* **10**, 1223-1231, doi:10.1039/c8mt00146d (2018).
- 1140 79 Cuny, H. *et al.* NAD deficiency due to environmental factors or gene-environment  
1141 interactions causes congenital malformations and miscarriage in mice. *Proc Natl Acad*  
1142 *Sci U S A* **117**, 3738-3747, doi:10.1073/pnas.1916588117 (2020).
- 1143 80 Shi, H. *et al.* NAD Deficiency, Congenital Malformations, and Niacin  
1144 Supplementation. *N Engl J Med* **377**, 544-552, doi:10.1056/NEJMoa1616361 (2017).
- 1145 81 Karczewski, K. J. *et al.* The mutational constraint spectrum quantified from variation  
1146 in 141,456 humans. *Nature* **581**, 434-443, doi:10.1038/s41586-020-2308-7 (2020).

- 1147 82 Maclean, G., Dolle, P. & Petkovich, M. Genetic disruption of CYP26B1 severely  
1148 affects development of neural crest derived head structures, but does not compromise  
1149 hindbrain patterning. *Dev Dyn* **238**, 732-745, doi:10.1002/dvdy.21878 (2009).
- 1150 83 Okano, J. *et al.* The regulation of endogenous retinoic acid level through CYP26B1  
1151 is required for elevation of palatal shelves. *Dev Dyn* **241**, 1744-1756,  
1152 doi:10.1002/dvdy.23862 (2012).
- 1153 84 Kalter, H. & Warkany, J. Experimental production of congenital malformations in  
1154 strains of inbred mice by maternal treatment with hypervitaminosis A. *Am J Pathol* **38**,  
1155 1-21 (1961).
- 1156 85 Kallen, B., Mastroiacovo, P. & Robert, E. Major congenital malformations in Down  
1157 syndrome. *Am J Med Genet* **65**, 160-166, doi:10.1002/(SICI)1096-  
1158 8628(19961016)65:2<160::AID-AJMG16>3.0.CO;2-O (1996).
- 1159 86 Okubo, T. *et al.* Ripply3, a Tbx1 repressor, is required for development of the  
1160 pharyngeal apparatus and its derivatives in mice. *Development* **138**, 339-348,  
1161 doi:10.1242/dev.054056 (2011).
- 1162 87 Janesick, A., Shiotsugu, J., Taketani, M. & Blumberg, B. RIPPLY3 is a retinoic acid-  
1163 inducible repressor required for setting the borders of the pre-placodal ectoderm.  
1164 *Development* **139**, 1213-1224, doi:10.1242/dev.071456 (2012).
- 1165 88 Jerome, L. A. & Papaioannou, V. E. DiGeorge syndrome phenotype in mice mutant  
1166 for the T-box gene, Tbx1. *Nat Genet* **27**, 286-291, doi:10.1038/85845 (2001).
- 1167 89 Pierson, J. C., Ferris, L. K. & Schwarz, E. B. We Pledge to Change iPLEDGE.  
1168 *JAMA Dermatol* **151**, 701-702, doi:10.1001/jamadermatol.2015.0736 (2015).
- 1169 90 World Health Organization. *Global prevalence of vitamin A deficiency in populations*  
1170 *at risk 1995–2005. WHO Global Database on Vitamin A Deficiency.* (World Health  
1171 Organization, 2009).
- 1172 91 Pavord, S. *et al.* UK guidelines on the management of iron deficiency in pregnancy.  
1173 *Br J Haematol* **156**, 588-600, doi:10.1111/j.1365-2141.2011.09012.x (2012).
- 1174 92 World Health Organization. *Guideline: Daily iron and folic acid supplementation in*  
1175 *pregnant women.* Geneva (2012).
- 1176 93 Lakhal-Littleton, S. *et al.* Cardiac ferroportin regulates cellular iron homeostasis and  
1177 is important for cardiac function. *Proc Natl Acad Sci U S A* **112**, 3164-3169,  
1178 doi:10.1073/pnas.1422373112 (2015).
- 1179 94 Cleary, J. O. *et al.* Cardiac phenotyping in ex vivo murine embryos using microMRI.  
1180 *NMR Biomed* **22**, 857-866, doi:10.1002/nbm.1400 (2009).
- 1181 95 Zamyadi, M. *et al.* Mouse embryonic phenotyping by morphometric analysis of MR  
1182 images. *Physiol Genomics* **42A**, 89-95, doi:10.1152/physiolgenomics.00091.2010  
1183 (2010).
- 1184 96 Margosian, P., DeMeester, G. & Liu, H. in *eMagRes* (eds R.K Harris & R.L.  
1185 Wasylishen). doi:10.1002/9780470034590.emrstm0376 (2007).
- 1186 97 Weninger, W. J. & Mohun, T. J. Three-dimensional analysis of molecular signals  
1187 with episcopic imaging techniques. *Methods Mol Biol* **411**, 35-46, doi:10.1007/978-1-  
1188 59745-549-7\_4 (2007).
- 1189 98 Dobin, A. *et al.* STAR: ultrafast universal RNA-seq aligner. *Bioinformatics* **29**, 15-21,  
1190 doi:10.1093/bioinformatics/bts635 (2013).
- 1191 99 Liao, Y., Smyth, G. K. & Shi, W. The R package Rsubread is easier, faster, cheaper  
1192 and better for alignment and quantification of RNA sequencing reads. *Nucleic Acids Res*  
1193 **47**, doi:ARTN e47, doi:10.1093/nar/gkz114 (2019).
- 1194 100 McCarthy, D. J., Chen, Y. S. & Smyth, G. K. Differential expression analysis of  
1195 multifactor RNA-Seq experiments with respect to biological variation. *Nucleic Acids Res*  
1196 **40**, 4288-4297, doi:10.1093/nar/gks042 (2012).

- 1197 101 Robinson, M. D. & Oshlack, A. A scaling normalization method for differential  
1198 expression analysis of RNA-seq data. *Genome Biol* **11**, doi:ARTN R25, doi:10.1186/gb-  
1199 2010-11-3-r25 (2010).
- 1200 102 Law, C. W., Chen, Y. S., Shi, W. & Smyth, G. K. voom: precision weights unlock  
1201 linear model analysis tools for RNA-seq read counts. *Genome Biol* **15**, doi:ARTN R29,  
1202 doi:10.1186/gb-2014-15-2-r29 (2014).
- 1203 103 Ritchie, M. E. *et al.* limma powers differential expression analyses for RNA-  
1204 sequencing and microarray studies. *Nucleic Acids Res* **43**, doi:ARTN e47,  
1205 doi:10.1093/nar/gkv007 (2015).
- 1206 104 Johnson, W. E., Li, C. & Rabinovic, A. Adjusting batch effects in microarray  
1207 expression data using empirical Bayes methods. *Biostatistics* **8**, 118-127,  
1208 doi:10.1093/biostatistics/kxj037 (2007).
- 1209 105 Leek, J. T. *et al.* sva: Surrogate Variable Analysis. *R package version 3.32.1*  
1210 (2019).
- 1211 106 Benjamini, Y. & Hochberg, Y. Controlling the False Discovery Rate - a Practical and  
1212 Powerful Approach to Multiple Testing. *J R Stat Soc B* **57**, 289-300 (1995).
- 1213 107 Hogan, B., Beddington, R., Costantini, F. & Lacy, E. *Manipulating the Mouse*  
1214 *Embryo. A Laboratory Manual*. Second edn, (Cold Spring Harbor Laboratory Press,  
1215 1994).
- 1216 108 Bader, D., Masaki, T. & Fischman, D. A. Immunochemical analysis of myosin heavy  
1217 chain during avian myogenesis in vivo and in vitro. *J Cell Biol* **95**, 763-770,  
1218 doi:10.1083/jcb.95.3.763 (1982).
- 1219

## 1220 **Acknowledgements**

1221 This work was supported by a University of Oxford, Medical Sciences Division, Medical  
1222 Research Fund grant MRF/TT2016/2207 (DBS); the Federated Foundation (DBS); an  
1223 Oxford British Heart Foundation Centre of Research Excellence Senior Transition  
1224 Research Fellowship RE/13/1/30181 (DBS); a BHF Senior Basic Science Research  
1225 Fellowship FS/17/55/33100 (DBS); Oxford BHF CRE core infrastructure grants (DBS and  
1226 JIKS, RE/18/3/34214); the John Fell Oxford University Press Research Fund (DBS);  
1227 Nuffield Benefaction for Medicine and the Wellcome Trust Institutional Strategic Support  
1228 Fund (DBS and NV); Novo Nordisk postdoctoral fellowships (NN, JJM); a BHF  
1229 Intermediate Basic Science Research Fellowship FS/12/63/29895 (SLL); Vifor Pharma  
1230 (SLL); the Francis Crick Institute, which receives its core funding from Cancer Research  
1231 UK (FC001157, FC001117), the UK Medical Research Council (FC001157, FC001117)  
1232 and the Wellcome Trust (FC001157, FC001117) (TJM); the Francis Crick Institute which  
1233 receives its core funding from Cancer Research UK (FC001194), the UK Medical  
1234 Research Council (FC001194) and the Wellcome Trust (FC001194) (VLJT); a Wellcome  
1235 Trust grant 098327 (EMCF); a Wellcome Trust grant 098328 (EL-E, RA, VLJT); a Medical  
1236 Research Council grant U117562103 (TJM); a National Heart Foundation of Australia  
1237 Future Leader Fellowship 101204 (EG); and a NSW Health Early-Mid Career Fellowship  
1238 (EG). We thank BMS staff for animal husbandry; University of Oxford Department of Earth  
1239 Sciences for ICP-MS; the High-Throughput Genomics Group at the Wellcome Trust Centre  
1240 for Human Genetics (funded by Wellcome Trust grant 090532/Z/09/Z) for generation of the  
1241 RNA-Seq data; Michal Maj at the University of Oxford Sir William Dunn School of  
1242 Pathology flow cytometry facility for sorting cells; Nadia Halidi and the Micron Advanced  
1243 Bioimaging Unit (supported by Wellcome Strategic Awards 091911/B/10/Z and  
1244 107457/Z/15/Z); Ken Chien and Antonio Baldini for mouse strains; Elizabeth Robertson for  
1245 use of the Leica DM6000B microscope; Simon Bamforth for help with aortic arch artery 3D  
1246 modelling; and Robert Kelly and Paul Riley for critical comments on the text. The  
1247 monoclonal antibody MF20<sup>108</sup> developed by DA Fischman (Weill Cornell Medical College)  
1248 was obtained from the Developmental Studies Hybridoma Bank, created by the NICHD of

1249 the NIH and maintained at The University of Iowa, Department of Biology, Iowa City, IA  
1250 52242.

1251 **Author contributions** (CRediT taxonomy)

1252 Conceptualization: DBS; Methodology: JIK, NV, JJM, TJM, EG, DBS; Software JM, MT,  
1253 JJM, EG; Formal analysis JIK, NV, DS, JM, MT, SEH, EG, DBS; Investigation JIK, NV,  
1254 DS, JM, MT, SEH, JJM, AJ, EMS, MW, EH, FP, EL-E, RA, EG, DBS; Resources EMCF,  
1255 VLJT; Writing – original draft preparation DBS; Writing – review and editing JIK, NV, DS,  
1256 TJM, DBS; Visualization JIK, NV, EG, DBS; Supervision NV, VLJT, TJM, SLL, EG, DBS;  
1257 Project administration DBS; Funding acquisition JIK, NV, JMM, EMCF, VLJT, TJM, SLL,  
1258 EG, DBS.
